# Supplementary material for: Selective catalytic synthesis of new terpenic chlorides using NaDCC as an eco-friendly and highly stable FAC agent
Source: Royal Society of Chemistry journal article supplement (doi:10.1039/d3ra05792e), 2023-01-01
Supplement: d3ra05792e1.pdf [file d3ra05792e1.pdf]

## Supplementary Material

### Selective catalytic synthesis of new terpenic chlorides using NaDCC as an eco-friendly and highly stable FAC agent

Salim Adam Labyad<sup>1</sup>, Ayoub Abdelkader Mekkaoui<sup>2\*</sup>, Mouhsine Laayati<sup>1,2</sup>, Hamza Orfi<sup>1</sup>,  
Larbi El Firdoussi<sup>2</sup>, Soufiane El Houssame<sup>1\*</sup>

<sup>1</sup> Laboratoire des Sciences des Matériaux, Mathématiques et Environnement, Université Sultan Moulay Slimane, Faculté Polydisciplinaire de Khouribga, BP 145, Khouribga 25000, Morocco.

<sup>2</sup> Laboratoire de Chimie Moléculaire, Equipe de Chimie de Coordination et de Catalyse, Département de Chimie, Faculté des Sciences Semlalia, BP 2390, Marrakech 40001, Morocco.

\* Corresponding authors. E-mail addresses: [mekk.ayoub@gmail.com](mailto:mekk.ayoub@gmail.com) (A. A. Mekkaoui) [hous\\_soufiane@hotmail.com](mailto:hous_soufiane@hotmail.com) (S. El Houssame)

List of supplementary materials:

- ❖ Spectral data of terpenic chlorinated compounds.
- ❖ NMR and MS spectra of terpenic chlorinated compounds.

## ❖ Spectral data of terpenic chlorinated compounds

### **Carvone monochloride b**

$^1\text{H}$  NMR (300 MHz) d 6.70 (m, 1H, =CH), 5.20 (s, 1H, =CH<sub>2</sub>), 4.99 (s, 1H, =CH<sub>2</sub>), 4.03 (s, 2H, -CH<sub>2</sub>Cl), 2.91 (m, 1H, CH), 2.53 (m, 2H, CH<sub>2</sub>), 2.27 (m, 2H, CH<sub>2</sub>), 1.75 (s, 3H, -CH<sub>3</sub>).

$^{13}\text{C}$  NMR (75 MHz) d 198.94 (C=O), 146.57 (=C-), 144.11 (=CH-), 135.6 (=C-), 115.16 (=CH<sub>2</sub>), 46.95 (CH<sub>2</sub>Cl), 43.02 (CH<sub>2</sub>), 37.81 (CH), 31.38 (CH<sub>2</sub>), 15.67 (CH<sub>3</sub>).

MS (EI): m/z = 184.0176 [M]<sup>+</sup>.

### **Carvone dichloride c**

$^1\text{H}$  NMR (300 MHz) d 6.75 (m, 1H, =CH), 3.53 (m, 2H, -CH<sub>2</sub>Cl), 2.61 (m, 2H, CH<sub>2</sub>), 2.48 (m, 1H, CH), 2.32 (m, 2H, CH<sub>2</sub>), 1.75 (s, 3H, CH<sub>3</sub>), 1.24 (s, 3H, CH<sub>3</sub>).

$^{13}\text{C}$  NMR (75 MHz) d 199.60 (C=O), 144.56 (=CH-), 135.20 (=C-), 72.79 (-C-Cl), 52.29 (CH<sub>2</sub>Cl), 41.57 (CH), 39.23 (CH<sub>2</sub>), 26.26 (CH<sub>2</sub>), 21.82 (CH<sub>3</sub>), 15.55 (CH<sub>3</sub>).

MS (EI): m/z = 220.0758 [M]<sup>+</sup>.

### **Carvone vinyl allyl dichloride d**

$^1\text{H}$  NMR (300 MHz) d 6.73 (m, 1H, =CH), 6.12 (s, 1H, =CHCl), 4.24 (m, 2H, -CH<sub>2</sub>Cl), 3.01 (m, 1H, CH), 2.56 (m, 1H, CH<sub>2</sub>), 2.37 (m, 1H, CH<sub>2</sub>), 1.76 (s, 3H, CH<sub>3</sub>), 1.17 (m, 2H, CH<sub>2</sub>).

$^{13}\text{C}$  NMR (75 MHz) d 197.97 (C=O), 143.70 (=CH-), 139.70 (=C-), 135.77 (=C-), 119.94 (=CHCl), 42.65 (-CH<sub>2</sub>Cl), 39.57 (CH<sub>2</sub>), 39.26 (CH), 31.15 (CH<sub>2</sub>), 15.63 (CH<sub>3</sub>).

MS (EI): m/z = 219.061 [M]<sup>+</sup>.

### **Carvone trichloride e**

$^1\text{H}$  NMR (300 MHz) d 6.55 (m, 1H, =CH<sub>2</sub>), 3.44–3.97 (m, 4H, -CH<sub>2</sub>Cl), 2.10–2.62 (m, 4H), 1.44–1.70 (m, 4H).

$^{13}\text{C}$  NMR (75 MHz) d 197.44 (C=O), 143.04 (=CH-), 135.54 (=C-), 73.22 (-C-Cl), 50.80 (CH<sub>2</sub>Cl), 49.89 (CH<sub>2</sub>Cl), 41.04 (CH<sub>2</sub>), 39.32 (-CH), 29.69 (CH<sub>2</sub>), 15.54 (CH<sub>3</sub>).

MS (EI): m/z = 254.048 [M]<sup>+</sup>.

### **Limonene oxide monochloride g**

$^1\text{H}$  NMR (300 MHz) d 4.96 (s, 1H, =CH<sub>2</sub>), 4.95 (s, 1H, =CH<sub>2</sub>), 4.02 (s, 2H, -CH<sub>2</sub>Cl), 2.99 (m, 1H, -O-CH-), 2.36 (m, 1H, CH), 1.35–1.93 (m, 6H), 1.30 (s, 3H, -CH<sub>3</sub>).

$^{13}\text{C}$  NMR (75 MHz) d 148.76 (=C-), 113.65 (=CH<sub>2</sub>), 58.97 (O-CH), 57.12 (O-C), 47.37 (CH<sub>2</sub>Cl), 32.42 (CH), 30.70 (CH<sub>2</sub>), 28.46 (CH<sub>2</sub>), 24.66 (CH<sub>2</sub>), 22.96 (CH<sub>3</sub>).

MS (EI): m/z = 185.0668 [M]<sup>+</sup>.

### **Limonene oxide dichloride h**

$^1\text{H}$  NMR (300 MHz) d 3.55 (s, 2H, -CH<sub>2</sub>Cl), 3.02 (m, 1H, -O-CH-), 2.05 (m, 1H, CH), 2.01–1.50 (m, 6H), 1.33 (s, 3H, -CH<sub>3</sub>), 1.13 (s, 3H, -CH<sub>3</sub>).

$^{13}\text{C}$  NMR (75 MHz) d 73.37 (-C-Cl), 58.78 (O-CH), 57.66 (O-C), 53.23 (CH<sub>2</sub>Cl), 39.78 (CH), 30.58 (CH<sub>2</sub>), 24.89 (CH<sub>2</sub>), 22.85 (CH<sub>3</sub>), 22.96 (CH<sub>3</sub>), 20.45 (CH<sub>2</sub>).

MS (EI): m/z = 220.9909 [M]<sup>+</sup>.

### **Nootkatone monochloride i**

$^1\text{H}$  NMR (300 MHz) d 5.66 (m, 1H, =CH), 5.09 (s, 1H, =CH<sub>2</sub>), 4.90 (s, 1H, =CH<sub>2</sub>), 4.01 (s, 2H, -CH<sub>2</sub>Cl), 2.47 (m, 2H, CH<sub>2</sub>), 2.29 (m, 1H, CH), 2.15 (m, 2H, CH<sub>2</sub>), 1.91 (m, 2H, CH<sub>2</sub>), 1.27 (m, 1H, CH), 1.04–1.97 (m, 2H, CH<sub>2</sub>), 1.04 (s, 3H, -CH<sub>3</sub>), 0.87 (d, 3H, -CH<sub>3</sub>).

$^{13}\text{C}$  NMR (75 MHz) d 199.08 (C=O), 169.58 (=C-), 148.67 (=C-), 124.74 (=CH-), 113.80 (=CH<sub>2</sub>), 47.70 (CH<sub>2</sub>Cl), 44.17 (CH<sub>2</sub>), 41.95 (CH<sub>2</sub>), 40.30 (CH), 39.35 (-C-), 35.72 (CH), 32.85 (CH<sub>2</sub>), 31.91 (CH<sub>2</sub>), 16.67 (CH<sub>3</sub>), 14.87 (CH<sub>3</sub>).  
MS (EI): m/z = 252.107 [M]<sup>+</sup>.

#### **Nootkatone vinyl allyl dichloride k**

$^1\text{H}$  NMR (300 MHz) d 6.07 (s, 1H, =CHCl), 5.77 (s, 1H, =CH), 4.26 (m, 2H, -CH<sub>2</sub>Cl), 2.60 (m, 2H, CH<sub>2</sub>), 2.30 (m, 2H, CH<sub>2</sub>), 2.12 (m, 1H, CH), 2.00 (m, 2H, CH<sub>2</sub>) 1.41 (m, 1H, CH), 1.24 (m, 2H, CH<sub>2</sub>), 1.13 (s, 3H, CH<sub>3</sub>), 0.96 (m, 3H, CH<sub>3</sub>).  
 $^{13}\text{C}$  NMR (75 MHz) d 199.25 (C=O), 168.76 (=C-), 141.67 (=C-), 125.10 (=CH-), 118.79 (=CHCl), 43.87 (CH<sub>2</sub>Cl), 41.97 (CH<sub>2</sub>), 40.38 (CH<sub>2</sub>), 40.32 (-C-), 39.41 (-CH), 37.42 (-CH), 32.68 (CH<sub>2</sub>), 31.59 (CH<sub>2</sub>), 16.74 (CH<sub>3</sub>), 14.89 (CH<sub>3</sub>).  
MS (EI): m/z = 286.088 [M]<sup>+</sup>.

#### **Nootkatone dichloride l**

$^1\text{H}$  NMR (300 MHz) d 5.76 (m, 1H, =CH), 3.57 (m, 1H, CH<sub>2</sub>Cl), 3.64 (m, 1H, CH<sub>2</sub>Cl), 2.40 (m, 1H, CH), 2.23–2.50 (m, 2H, CH<sub>2</sub>), 2.06 (m, 2H, CH<sub>2</sub>), 1.99–2.29 (m, 2H, CH<sub>2</sub>), 1.87–2.12 (m, 2H, CH<sub>2</sub>), 1.25 (m, 1H, CH), 1.19 (s, 3H, -CH<sub>3</sub>), 1.10 (m, 3H, -CH<sub>3</sub>), 0.98 (m, 3H, -CH<sub>3</sub>).  
 $^{13}\text{C}$  NMR (75 MHz) d 199.50 (C=O), 170.08 (=C-), 124.62 (=CH-), 73.33 (-CCl), 53.47 (CH<sub>2</sub>Cl), 42.04 (CH<sub>2</sub>), 40.53 (CH), 39.96 (CH), 39.68 (CH), 32.72 (CH<sub>2</sub>), 27.70 (CH<sub>2</sub>), 26.67 (CH<sub>2</sub>), 21.22 (CH<sub>3</sub>), 16.75 (CH<sub>3</sub>), 14.96 (CH<sub>3</sub>).  
MS (EI): m/z = 288.097 [M]<sup>+</sup>.

#### **Pulegone monochloride n**

$^1\text{H}$  NMR (300 MHz) d 5.15 (s, 1H, =CH<sub>2</sub>), 5.08 (s, 1H, =CH<sub>2</sub>), 2.51–2.82 (m, 2H, CH<sub>2</sub>), 1.99–2.31 (m, 1H, CH), 1.88–2.19 (m, 2H, CH<sub>2</sub>), 1.79 (m, 3H, CH<sub>3</sub>), 1.10–1.52 (m, 2H, CH<sub>2</sub>), 0.97 (m, 3H, CH<sub>3</sub>).  
 $^{13}\text{C}$  NMR (75 MHz) d 203.90 (C=O), 143.44 (=C-), 115.29 (=CH<sub>2</sub>), 76.09 (-C-Cl), 45.56 (CH<sub>2</sub>), 37.97 (CH<sub>2</sub>), 34.42 (CH), 29.64 (CH<sub>2</sub>), 21.50 (CH<sub>3</sub>), 20.61 (CH<sub>3</sub>).  
MS (EI): m/z = 187.099 [M]<sup>+</sup>.

#### **Pulegone monochloride n'**

$^1\text{H}$  NMR (300 MHz) d 5.20 (s, 1H, =CH<sub>2</sub>), 5.14 (s, 1H, =CH<sub>2</sub>), 2.35–2.80 (m, 2H, CH<sub>2</sub>), 2.30 (m, 2H, CH<sub>2</sub>), 1.96 (m, 1H, CH), 1.90 (m, 3H, -CH<sub>3</sub>), 1.84 (m, 2H, CH<sub>2</sub>), 1.06 (d, 3H, -CH<sub>3</sub>).  
 $^{13}\text{C}$  NMR (75 MHz) d 203.37 (C=O), 141.35 (=C-), 115.22 (=CH<sub>2</sub>), 77.96 (-C-Cl), 46.76 (CH<sub>2</sub>), 38.46 (CH<sub>2</sub>), 33.87 (CH), 30.53 (CH<sub>2</sub>), 20.58 (CH<sub>3</sub>), 18.02 (CH<sub>3</sub>).  
MS (EI): m/z = 187.093 [M]<sup>+</sup>.

#### **Pulegone vinyl allyl dichloride o**

$^1\text{H}$  NMR (300 MHz) d 5.71 (s, 1H, =CH<sub>2</sub>), 5.57 (s, 1H, =CH<sub>2</sub>), 4.22 (m, 2H, -CH<sub>2</sub>Cl), 2.84 (m, 2H, CH<sub>2</sub>), 2.35 (m, 2H, CH<sub>2</sub>), 1.83–2.00 (m, 3H), 1.06 (m, 3H, CH<sub>3</sub>).  
 $^{13}\text{C}$  NMR (75 MHz) d 203.53 (C=O), 144.26 (=C-), 119.82 (=CH<sub>2</sub>), 74.28(-C-Cl), 45.23(CH<sub>2</sub>), 44.42(-CH<sub>2</sub>Cl), 38.29 (CH<sub>2</sub>), 34.57 (-CH), 29.43 (CH<sub>2</sub>), 21.81 (CH<sub>3</sub>).  
MS (EI): m/z = 221.055 [M]<sup>+</sup>.

#### **Pulegone vinyl allyl dichloride o'**

$^1\text{H}$  NMR (300 MHz) d 5.72 (s, 1H, =CH<sub>2</sub>), 5.53 (s, 1H, =CH<sub>2</sub>), 4.05–4.25 (m, 2H, -CH<sub>2</sub>Cl), 2.68–2.89 (m, 2H, CH<sub>2</sub>), 2.12–2.44 (m, 2H, CH<sub>2</sub>), 1.94 (m, 1H, CH), 1.19–1.67 (m, 2H, CH<sub>2</sub>), 0.91–1.04 (m, 3H, CH<sub>3</sub>).  
 $^{13}\text{C}$  NMR (75 MHz) d 202.49 (C=O), 142.86 (=C-), 119.97 (=CH<sub>2</sub>), 77.37 (-C-Cl), 47.54 (CH<sub>2</sub>), 43.48 (-CH<sub>2</sub>Cl), 39.03 (CH<sub>2</sub>), 34.48 (-CH), 31.08 (CH<sub>2</sub>), 21.10 (CH<sub>3</sub>).

MS (EI):  $m/z = 221.054 [M]^+$ .

#### **Perillyl aldehyde monochloride g**

$^1\text{H}$  NMR (300 MHz) d 9.43 (s, 1H, HC=O), 6.83 (m, 1H, =CH), 5.23 (s, 1H, =CH<sub>2</sub>), 5.02 (s, 1H, =CH<sub>2</sub>), 4.09 (s, 2H, -CH<sub>2</sub>Cl), 2.02–2.53 (m, 2H, CH<sub>2</sub>), 2.25 (m, 1H, CH), 1.42–1.72 (m, 2H, CH<sub>2</sub>), 0.87–1.24 (m, 2H, -CH<sub>2</sub>).

$^{13}\text{C}$  NMR (75 MHz) d 193.74 (HC=O), 149.82 (=CH-), 148.25 (=C-), 141.15 (=C-), 114.20 (=CH<sub>2</sub>), 47.56 (CH<sub>2</sub>Cl), 36.21 (CH), 32.13 (CH<sub>2</sub>), 26.51 (CH<sub>2</sub>), 21.46 (CH<sub>2</sub>).

MS (EI):  $m/z = 184.0441 [M]^+$ .

#### **Perillyl aldehyde vinyl allyl dichloride r**

$^1\text{H}$  NMR (300 MHz) d 9.45 (s, 1H, HC=O), 6.82 (m, 1H, =CH), 6.12 (m, 1H, =CHCl), 4.29 (s, 2H, -CH<sub>2</sub>Cl), 1.58–2.59 (m, 2H, CH<sub>2</sub>), 1.99 (m, 1H, CH), 1.26 (m, 2H, -CH<sub>2</sub>), 0.87–2.30 (m, 2H, CH<sub>2</sub>).

$^{13}\text{C}$  NMR (75 MHz) d 193.51 (HC=O), 148.79 (=CH-), 141.26 (=C-), 141.10 (=C-), 119.00 (=CHCl), 40.11 (CH<sub>2</sub>Cl), 37.86 (CH), 31.81 (CH<sub>2</sub>), 26.28 (CH<sub>2</sub>), 21.40 (CH<sub>2</sub>).

MS (EI):  $m/z = 218.0015 [M]^+$ .

#### **Limona ketone Dichloride u**

$^1\text{H}$  NMR (300 MHz) d 4.00 (m, 1H, -CHCl), 2.78 (m, 1H, CH), 1.90–2.30 (m, 2H, CH<sub>2</sub>), 2.12 (m, 3H), 1.70–1.84 (m, 2H, CH<sub>2</sub>), 1.53–1.70 (m, 2H, CH<sub>2</sub>), 1.30 (m, 3H, CH<sub>3</sub>).

$^{13}\text{C}$  NMR (75 MHz) d 210.96 (C=O), 71.54 (-C-Cl), 64.75(-CHCl), 44.65 (CH), 32.64 (CH<sub>2</sub>), 31.81 (CH<sub>2</sub>), 28.14 (CH<sub>3</sub>), 27.29 (CH<sub>3</sub>), 23.28 (CH<sub>2</sub>).

MS (EI):  $m/z = 207.066 [M]^+$ .

#### **Limona ketone epoxide y**

$^1\text{H}$  NMR (300 MHz) 2.97 (m, 1H), 2.22 (m, 1H), 2.08 (s, 3H, CH<sub>3</sub>), 2.06–1.94 (m, 3H), 1.37–1.72 (m, 3H), 1.28 (s, 3H, CH<sub>3</sub>).

$^{13}\text{C}$  NMR (75 MHz) d 210.46 (C=O), 58.22 (O-CH), 57.51(O-C), 46.38 (CH), 29.71 (CH<sub>2</sub>), 27.87 (CH<sub>2</sub>), 26.03 (CH<sub>3</sub>), 23.04 (CH<sub>2</sub>), 21.78 (CH<sub>3</sub>).

MS (EI):  $m/z = 154.0931 [M]^+$ .

## ❖ NMR and MS spectra of terpenic chlorinated compounds

### ➤ Derivatives of carvone **a**

#### • Carvone monochloride **b**

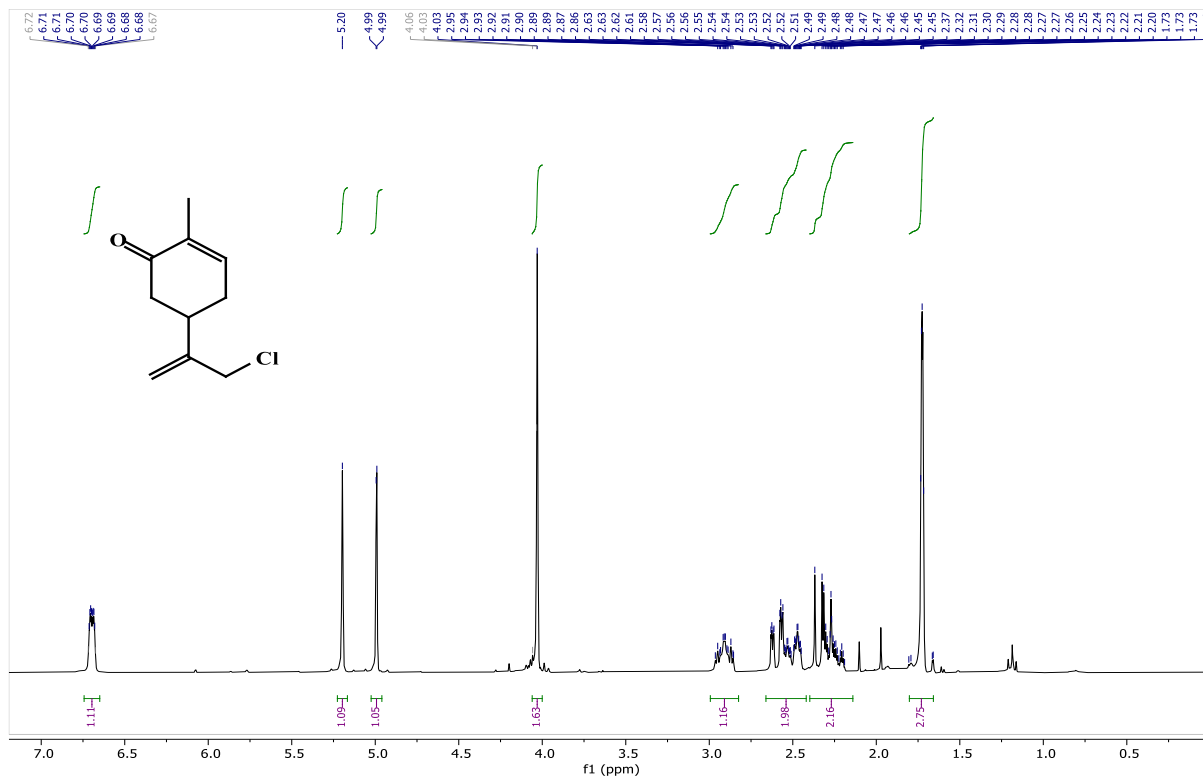

Figure S1: <sup>1</sup>H NMR spectrum of the carvone monochloride **b**.

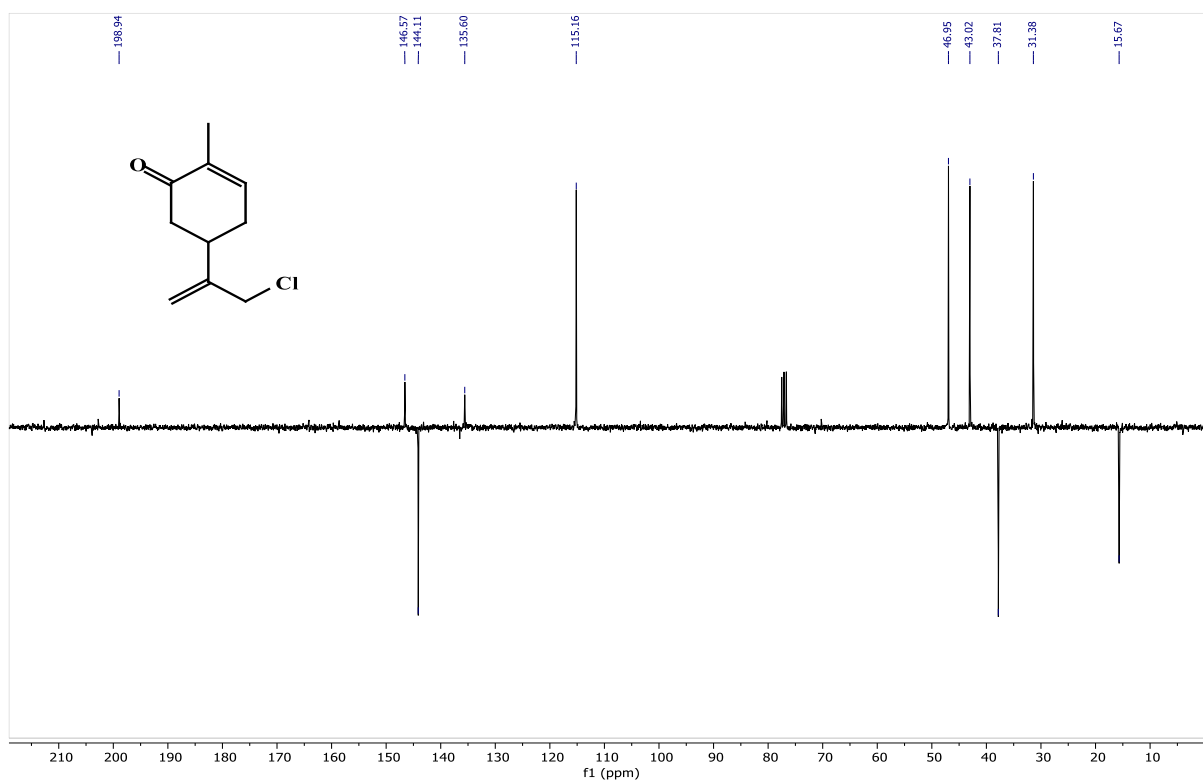

Figure S2: APT spectrum of the carvone monochloride **b**.

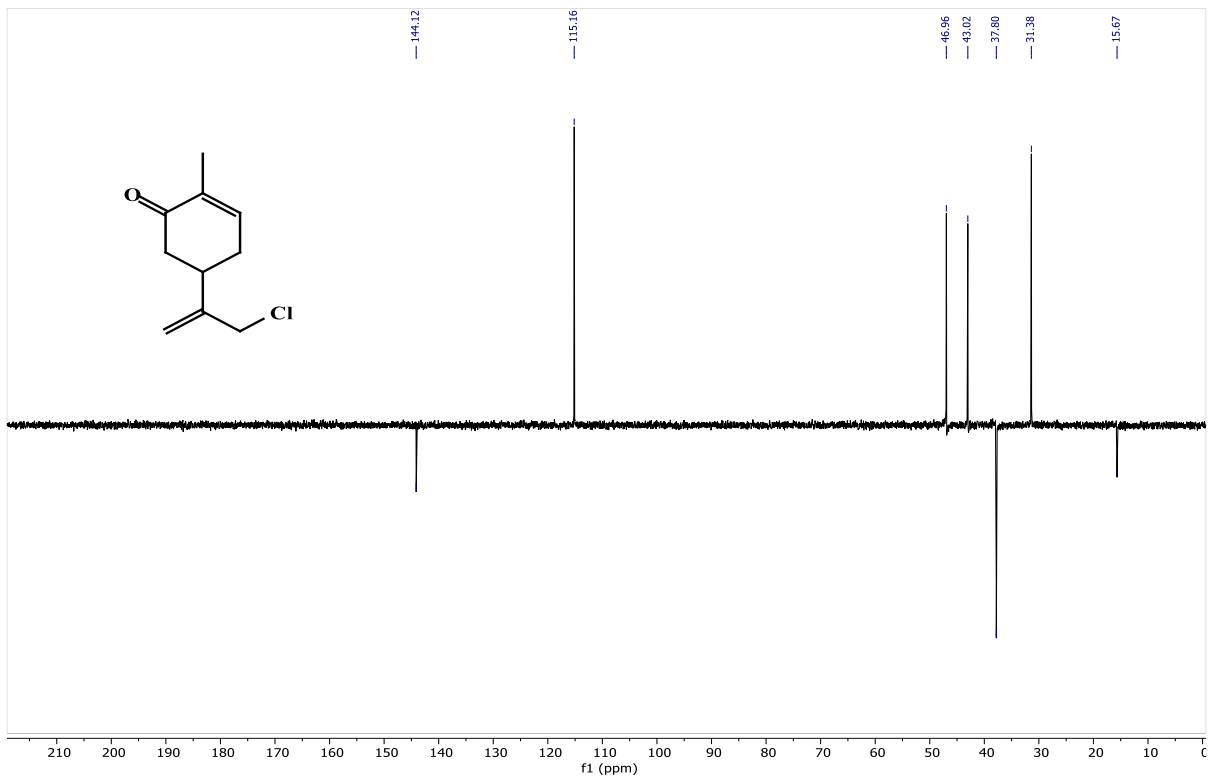

**Figure S3:** DEPT 135 spectrum of the carvone monochloride **b**.

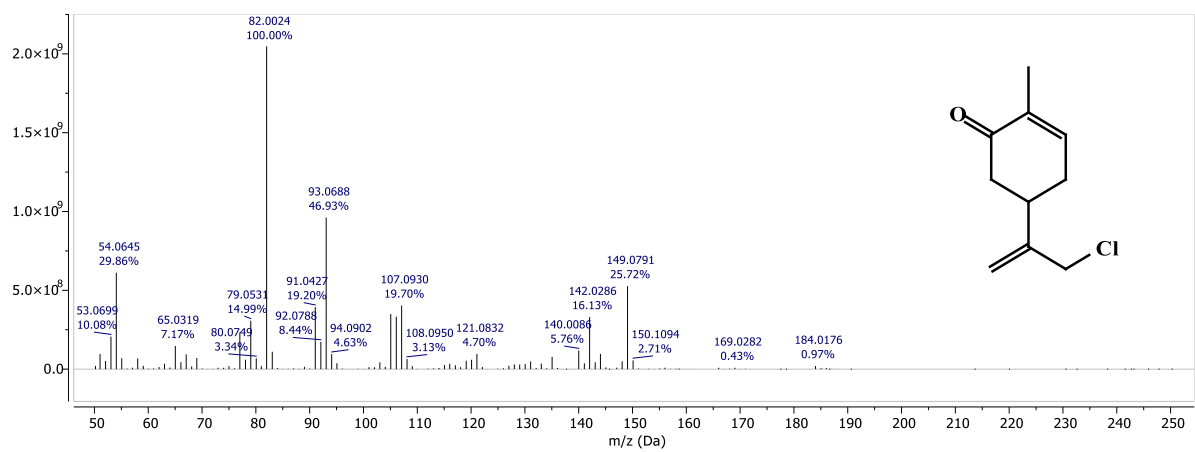

**Figure S4:** MS spectrum of the carvone monochloride **b**.

• Carvone dichloride **c**

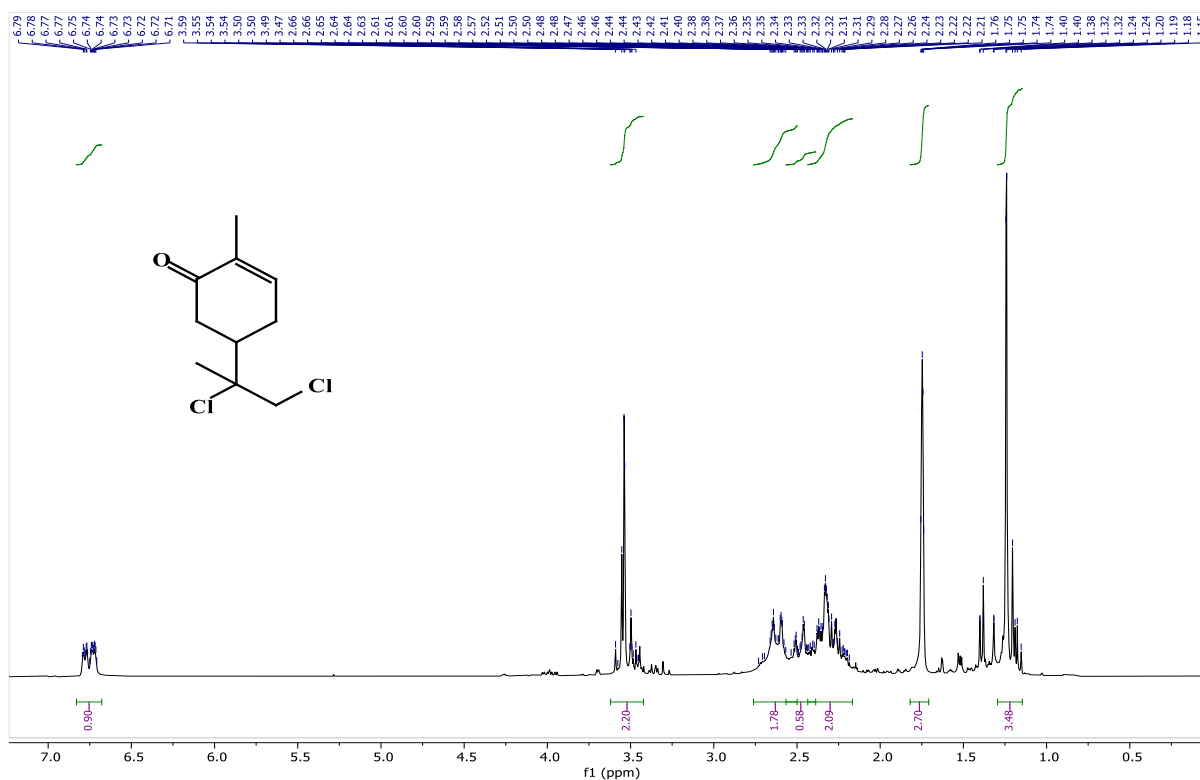

Figure S5: <sup>1</sup>H NMR spectrum of the carvone dichloride **c**.

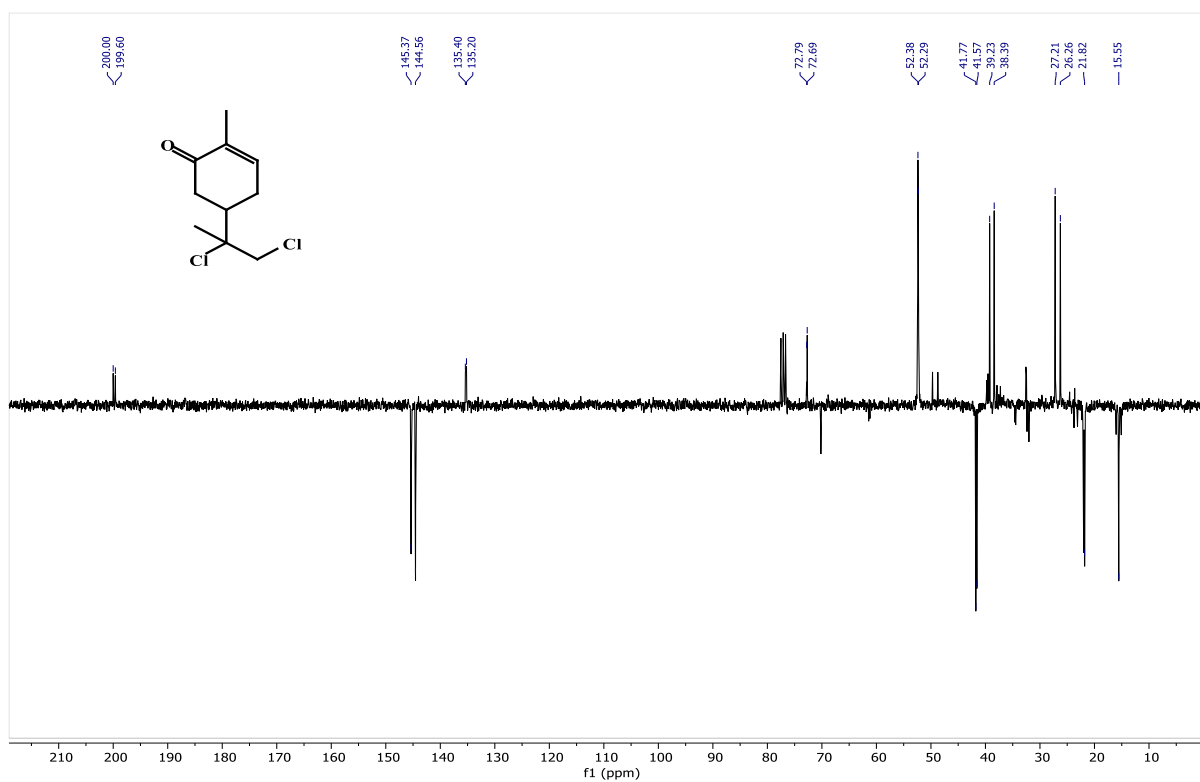

Figure S6: APT spectrum of the carvone dichloride **c**.

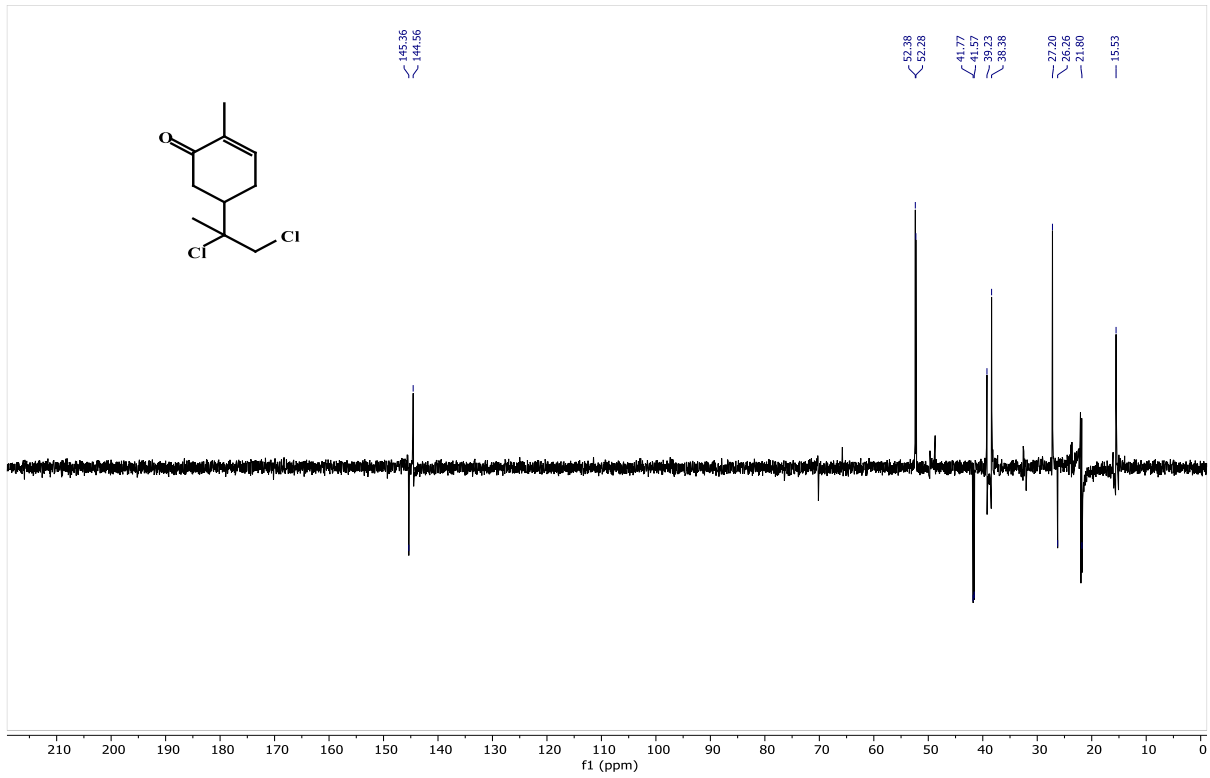

Figure S7: DEPT 135 spectrum of the carvone dichloride **c**.

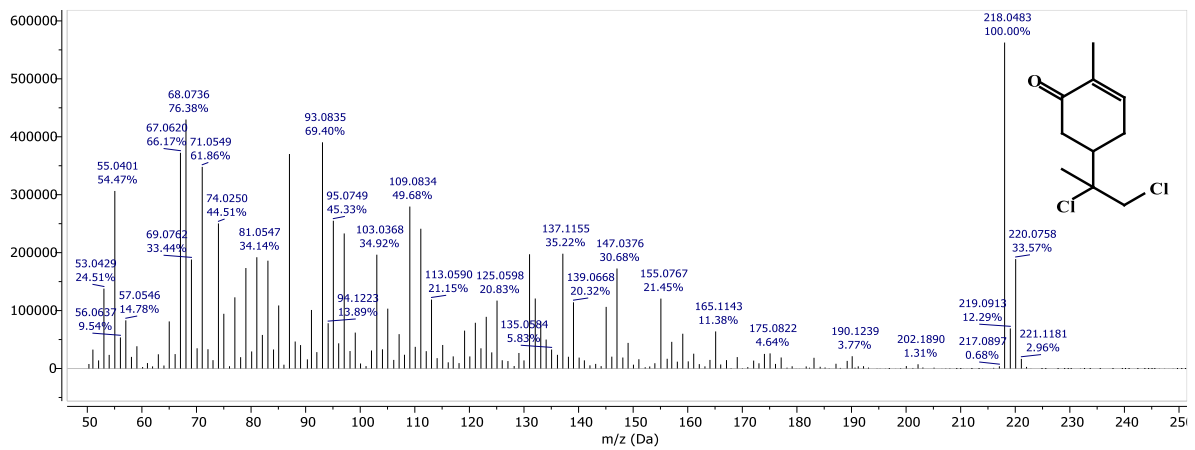

Figure S8: MS spectrum of the carvone dichloride **c**.



• Carvone vinyl allyl dichloride **d**

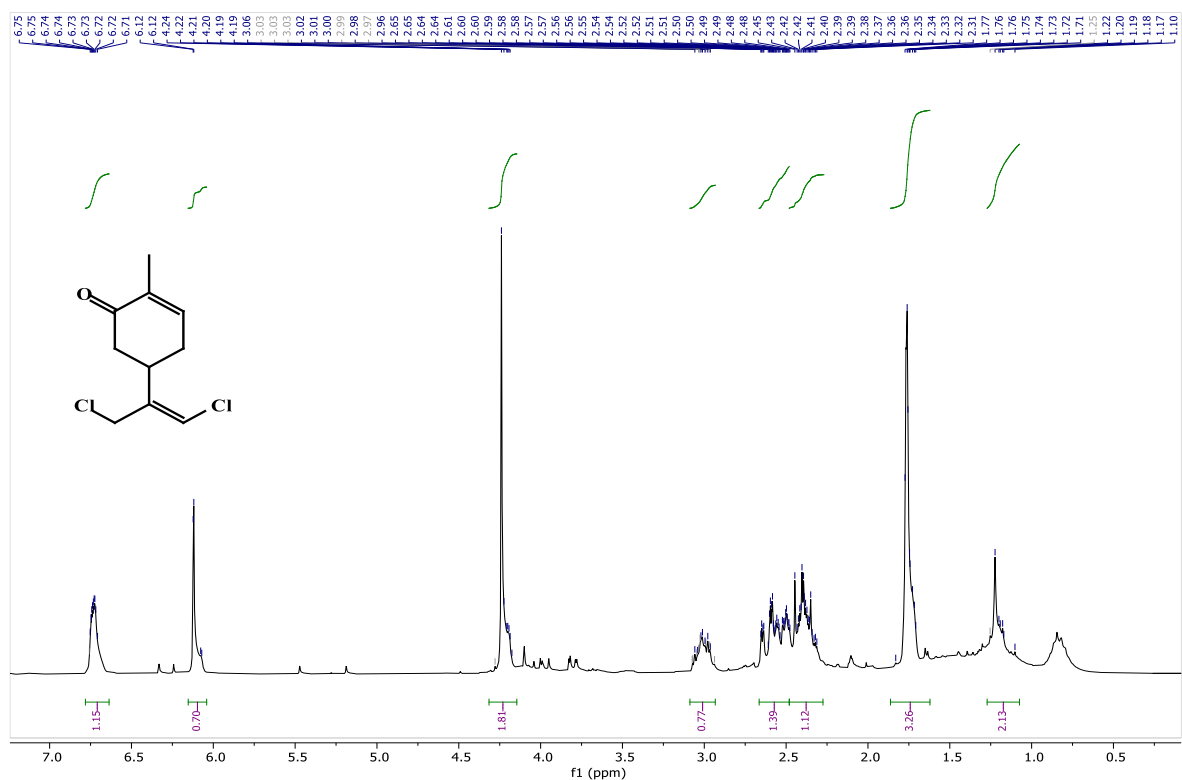

Figure S9:  $^1\text{H}$  NMR spectrum of the carvone vinyl allyl dichloride **d**.

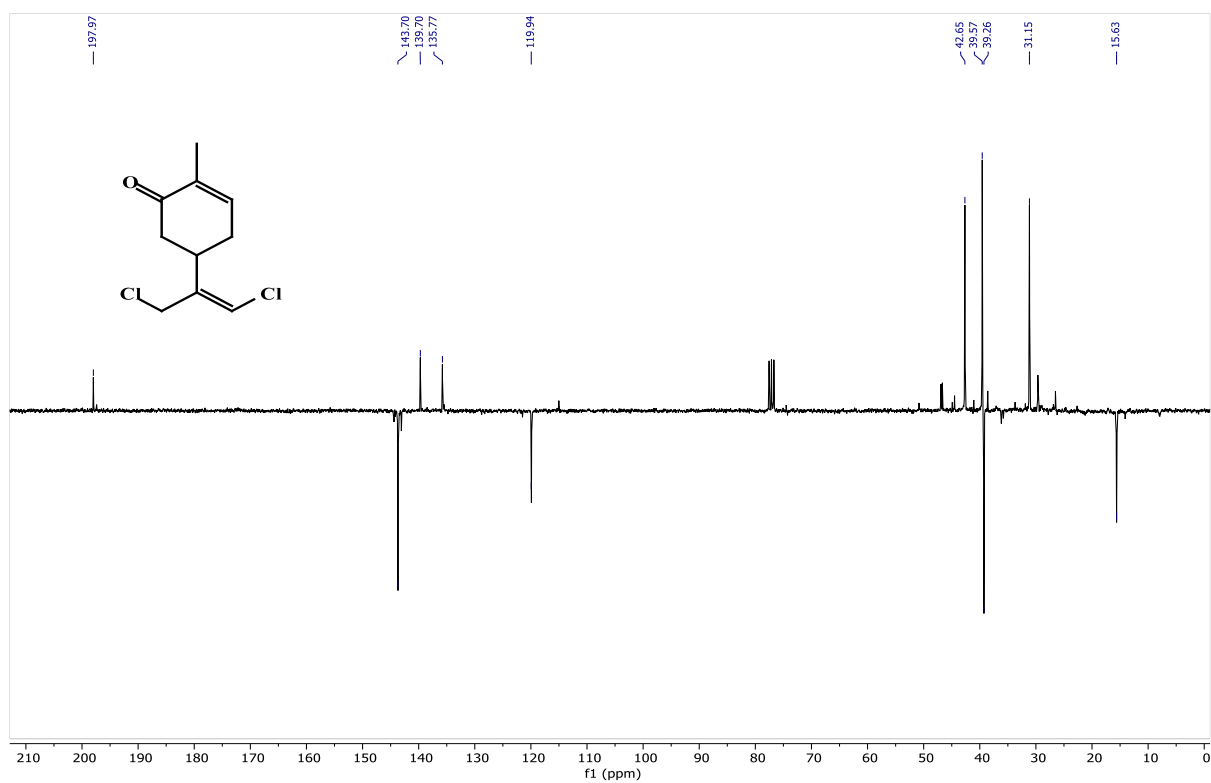

Figure S10: APT spectrum of the carvone vinyl allyl dichloride **d**.

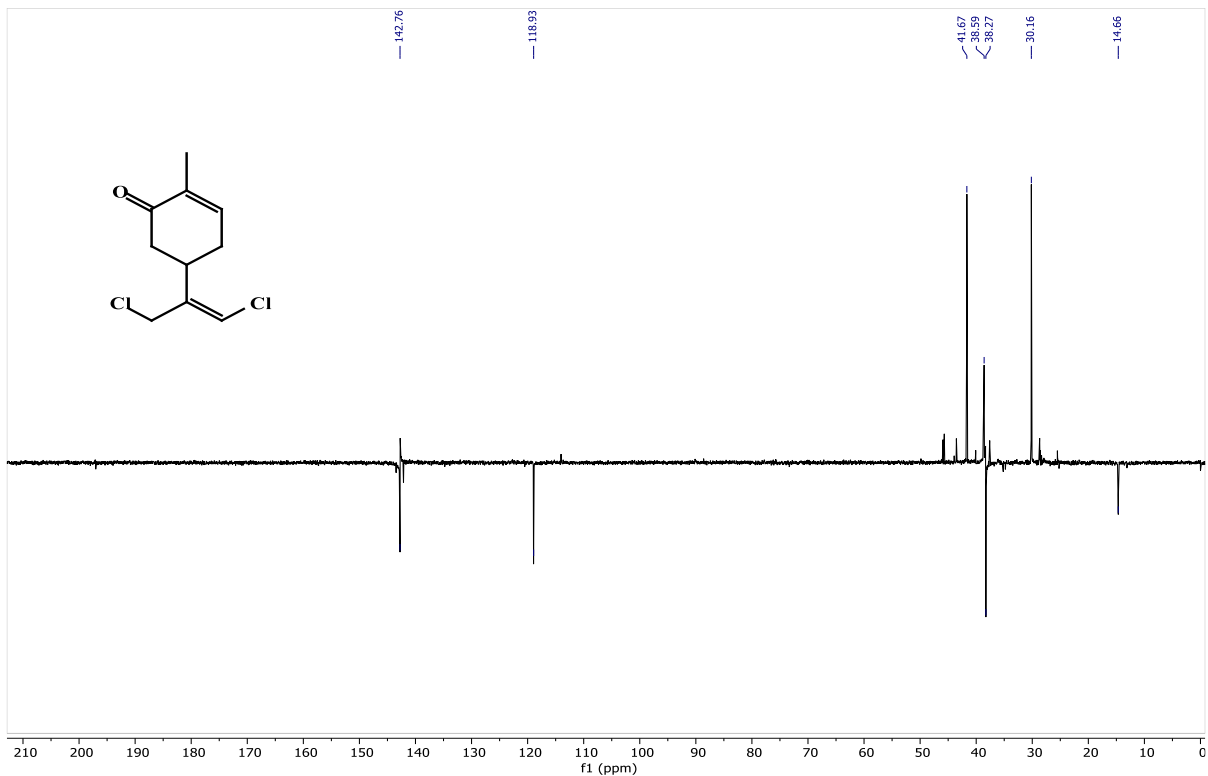

**Figure S11:** DEPT 135 spectrum of the carvone vinyl allyl dichloride **d**.

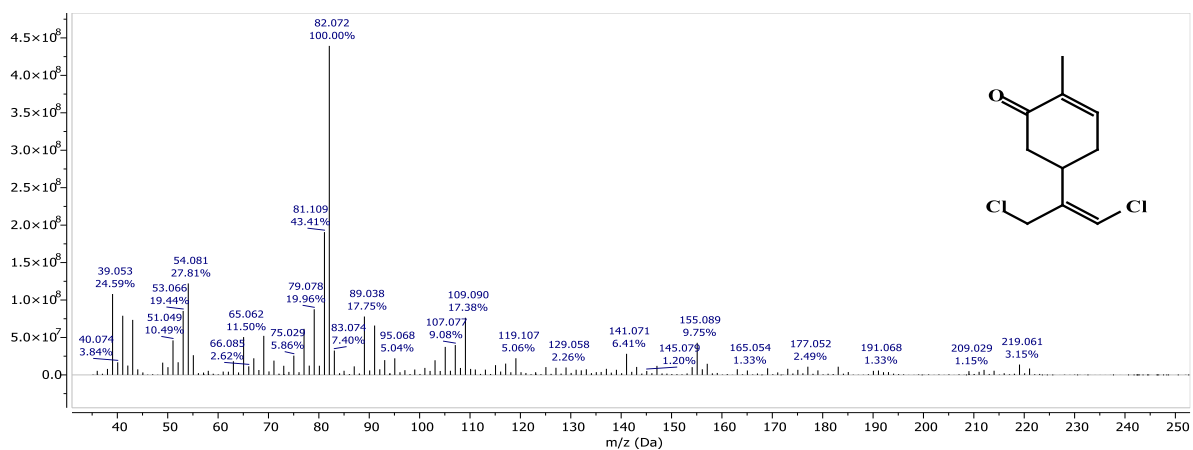

**Figure S12:** MS spectrum of the carvone vinyl allyl dichloride **d**.

• Carvone trichloride e

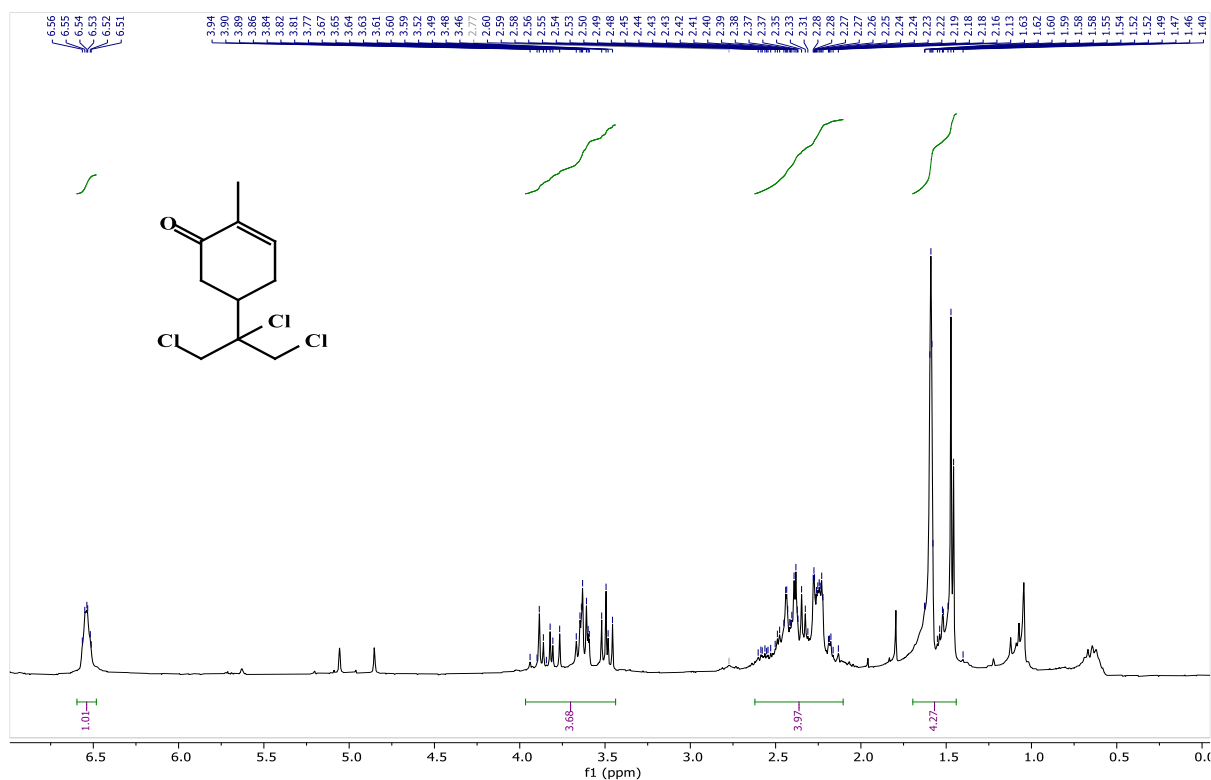

Figure S13: <sup>1</sup>H NMR spectrum of the carvone trichloride e in a complex mixture.

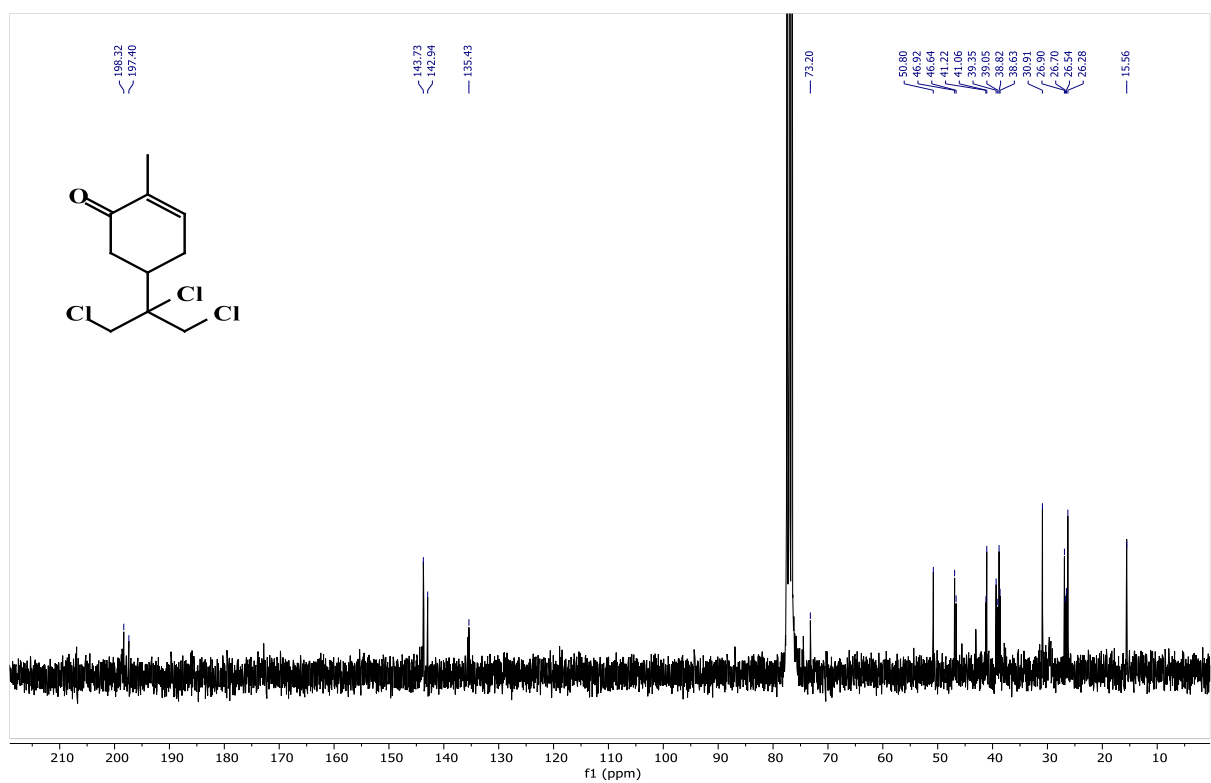

Figure S14: <sup>13</sup>C spectrum of the carvone trichloride e in a complex mixture.

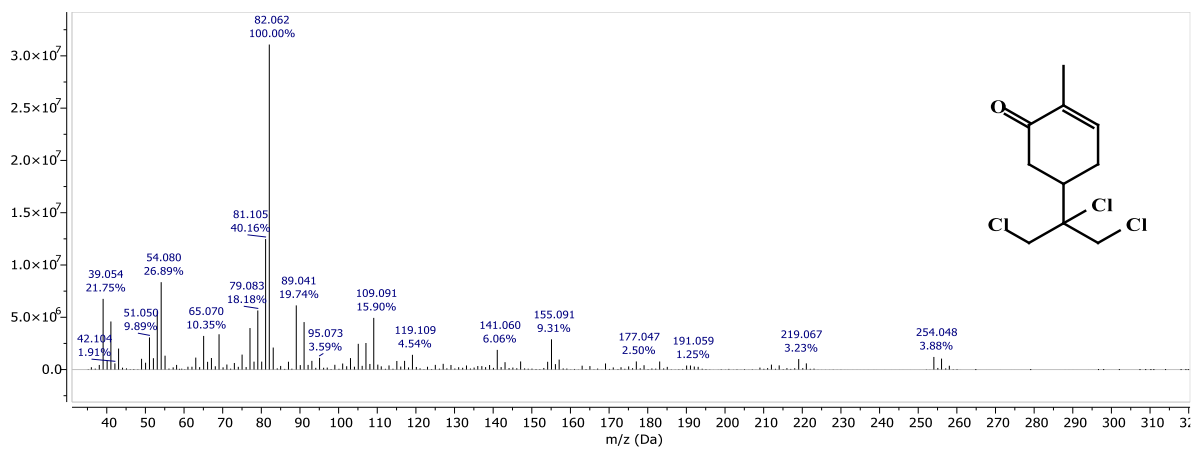

Figure S15: MS spectrum of the carvone trichloride **e**.

➤ Derivatives of limonene oxide **f**

• Limonene oxide monochloride **g**

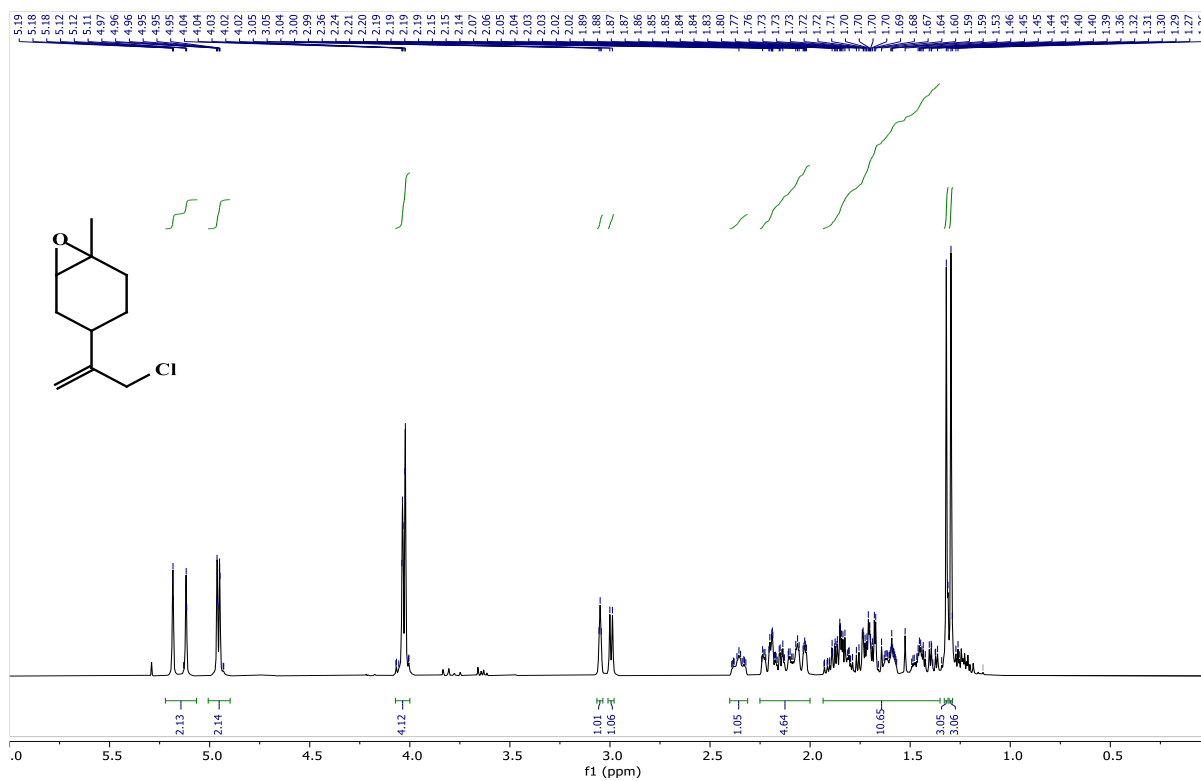

Figure S16:  $^1\text{H}$  NMR spectrum of the limonene oxide monochloride **g**.

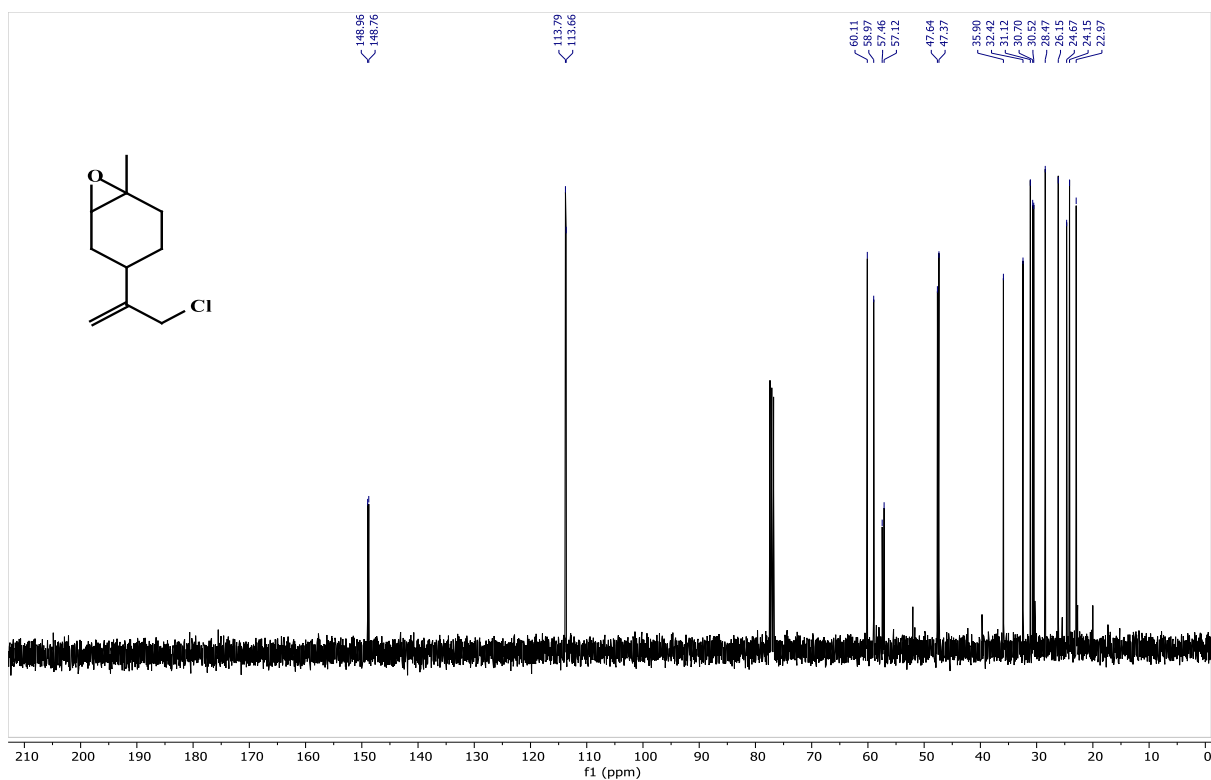

Figure S17:  $^{13}\text{C}$  spectrum of the limonene oxide monochloride **g**.

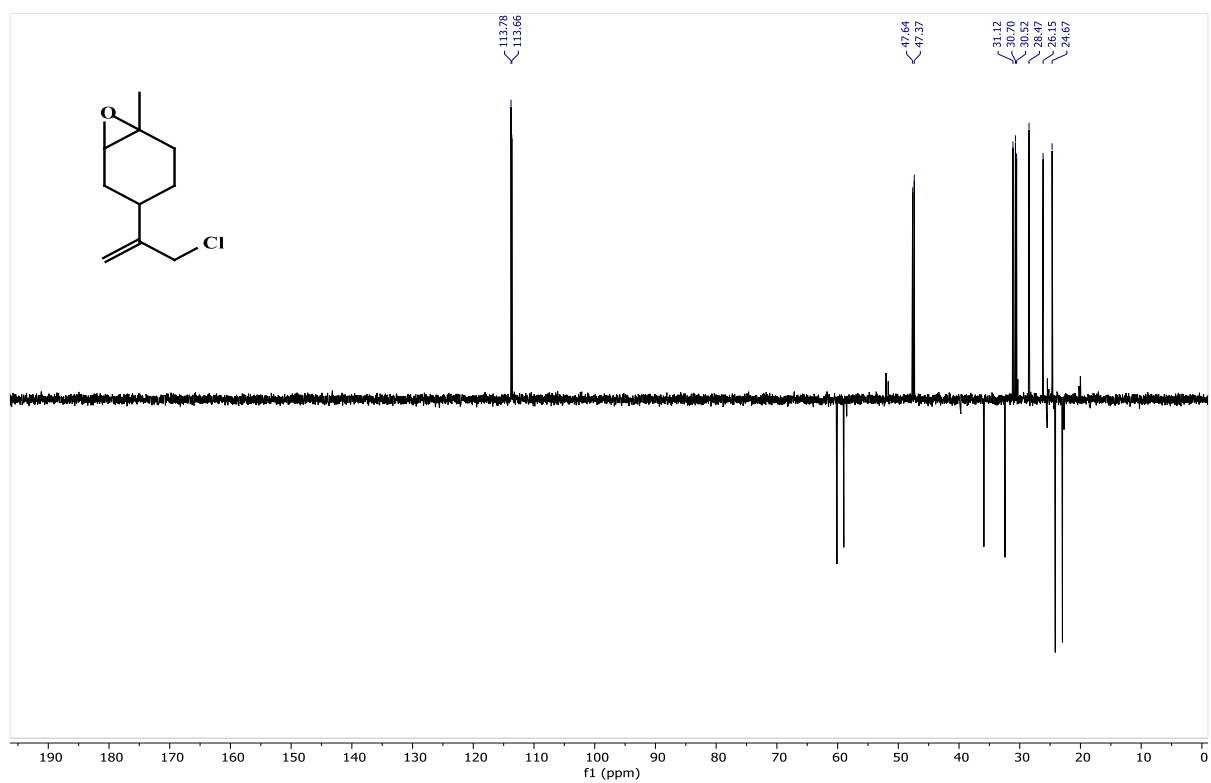

Figure S18: DEPT 135 spectrum of the limonene oxide monochloride **g**.

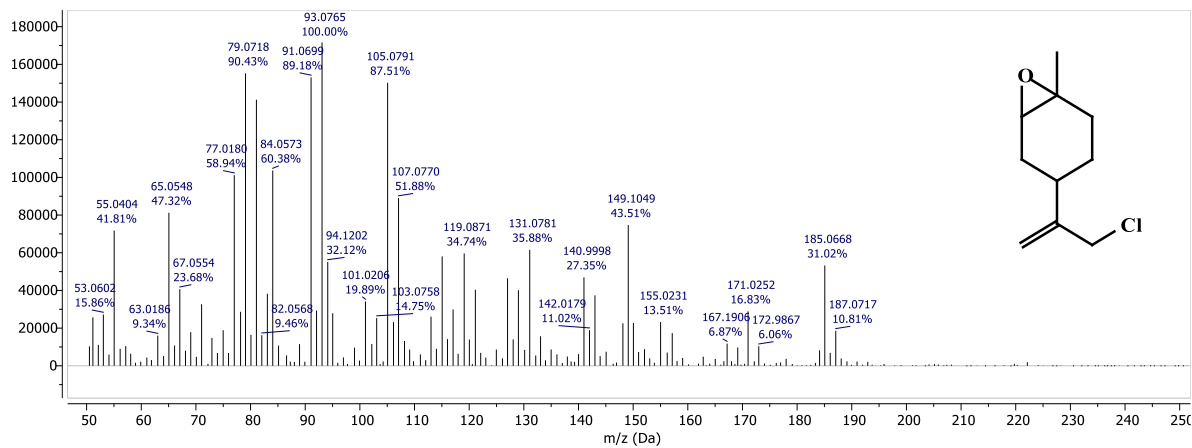

Figure S19: MS spectrum of the limonene oxide monochloride **g**.

- Limonene oxide dichloride **h**

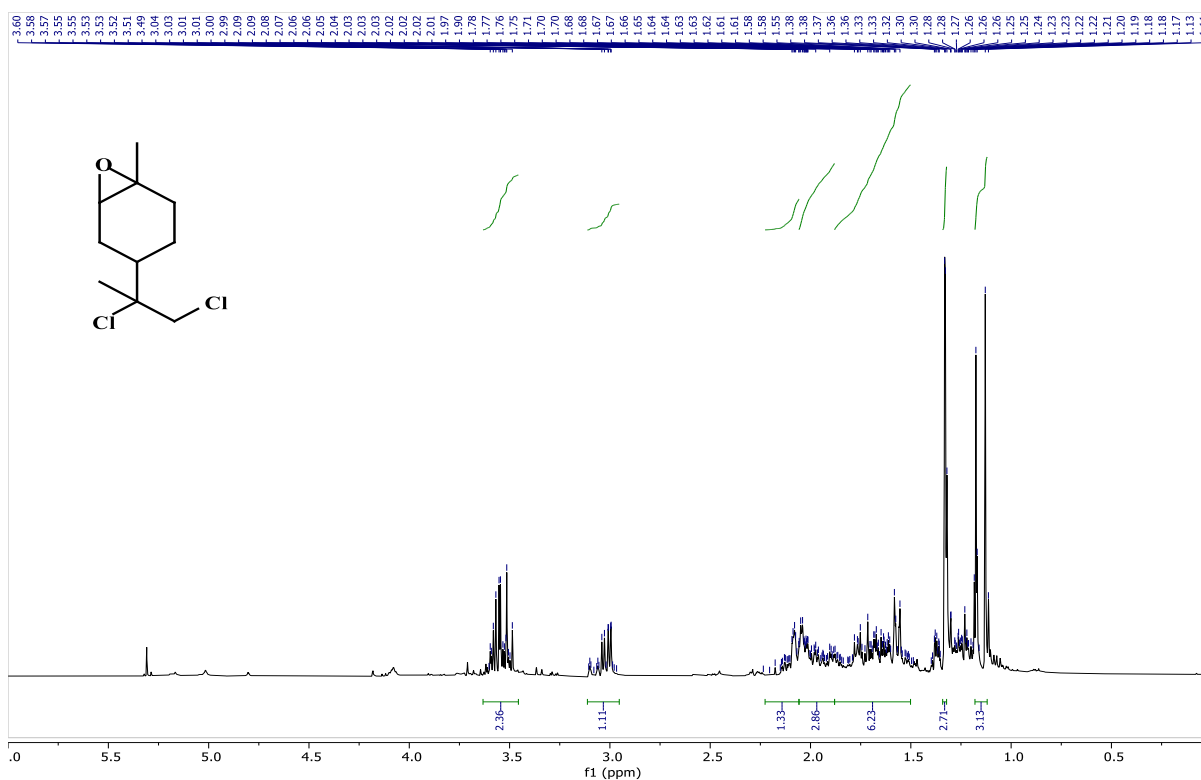

Figure S20:  $^1\text{H}$  NMR spectrum of the limonene oxide dichloride **h**.

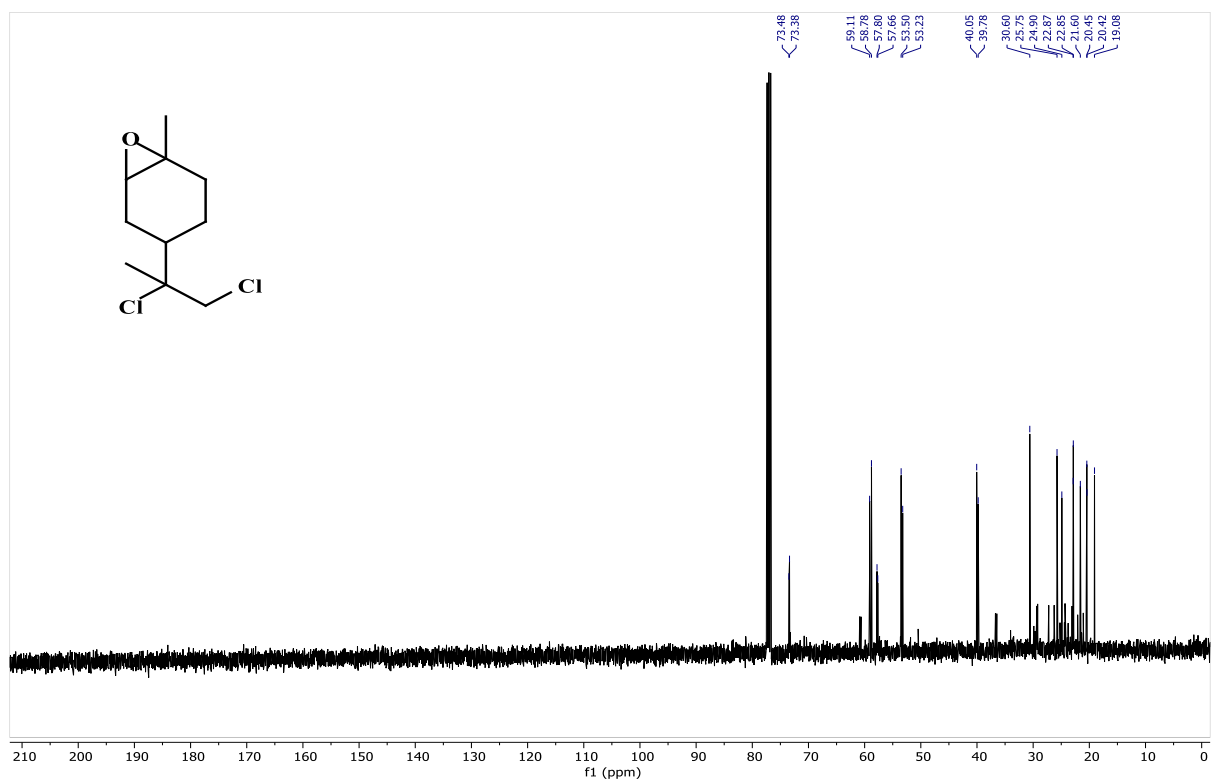

Figure S21:  $^{13}\text{C}$  spectrum of the limonene oxide dichloride **h**.

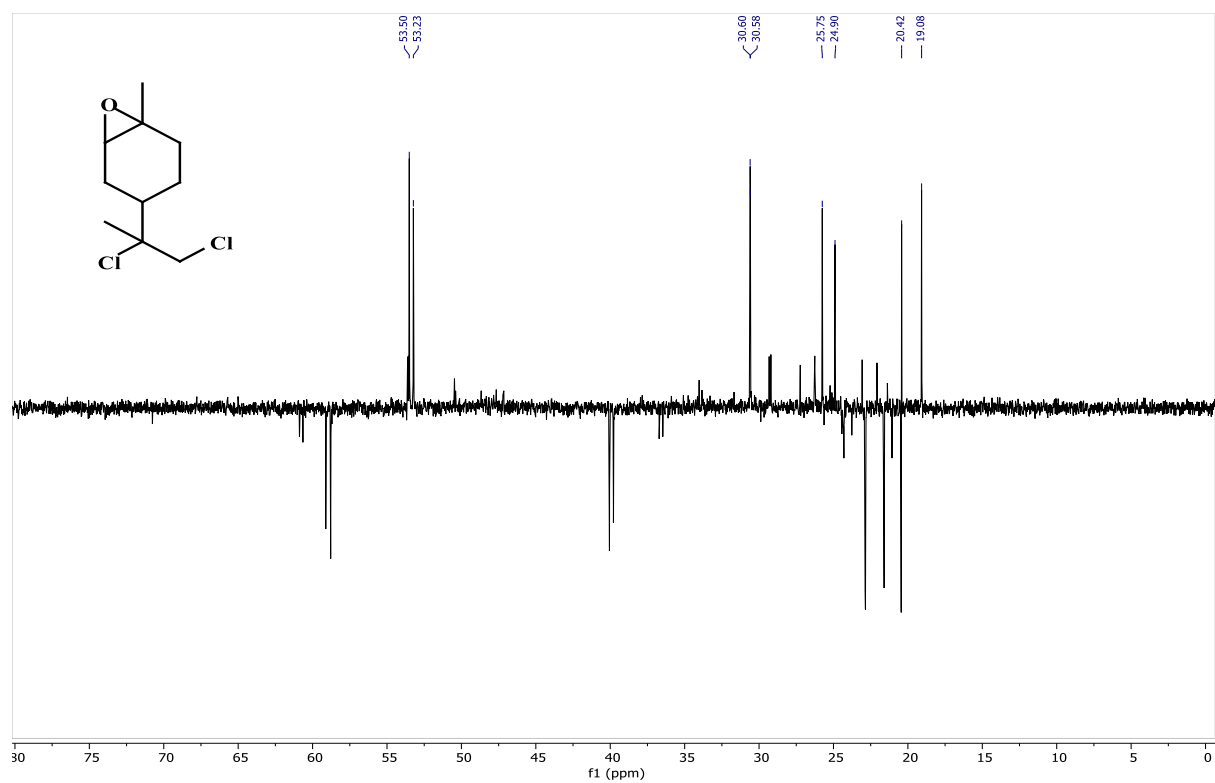

Figure S22: DEPT 135 spectrum of the limonene oxide dichloride **h**.

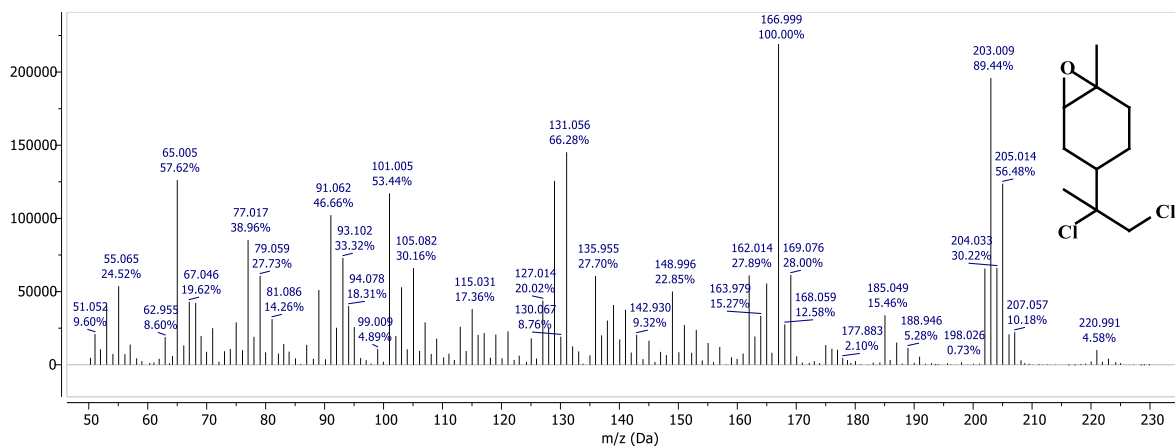

Figure S23: MS spectrum of the limonene oxide dichloride **h**.

➤ Derivatives of nootkatone **i**

● Nootkatone monochloride **j**

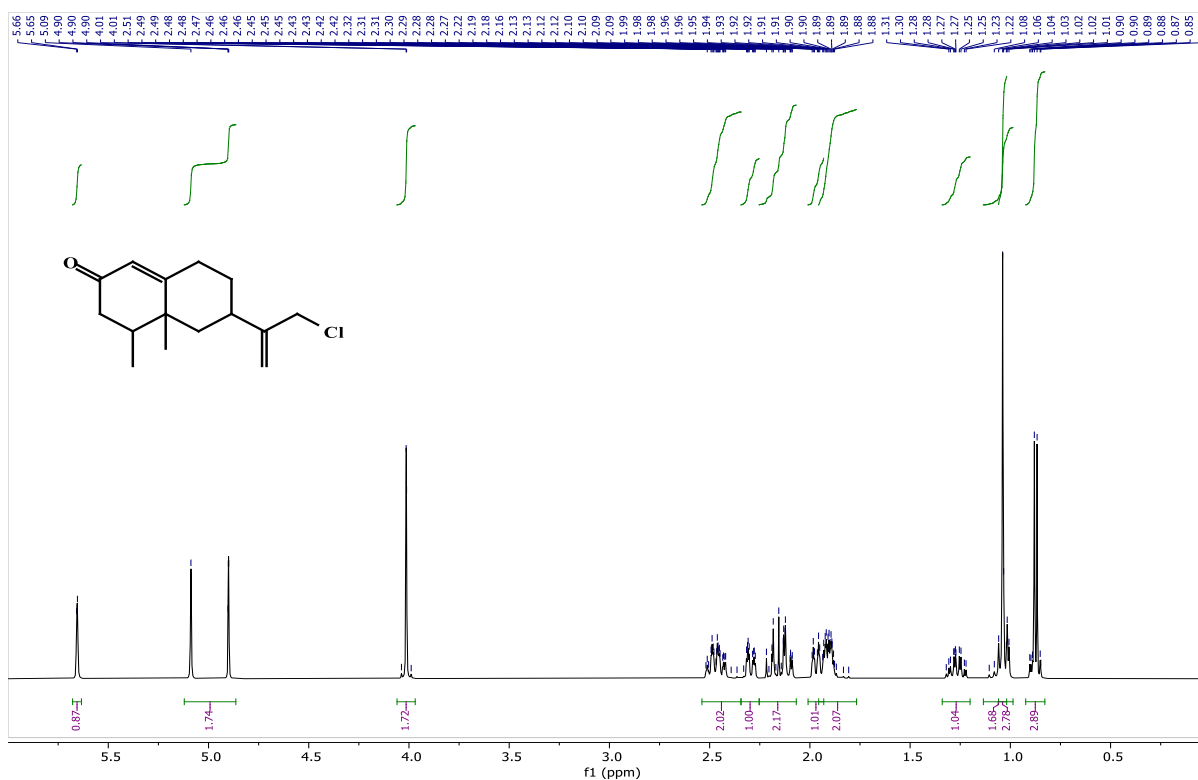

Figure S24: <sup>1</sup>H NMR spectrum of the nootkatone monochloride **j**.



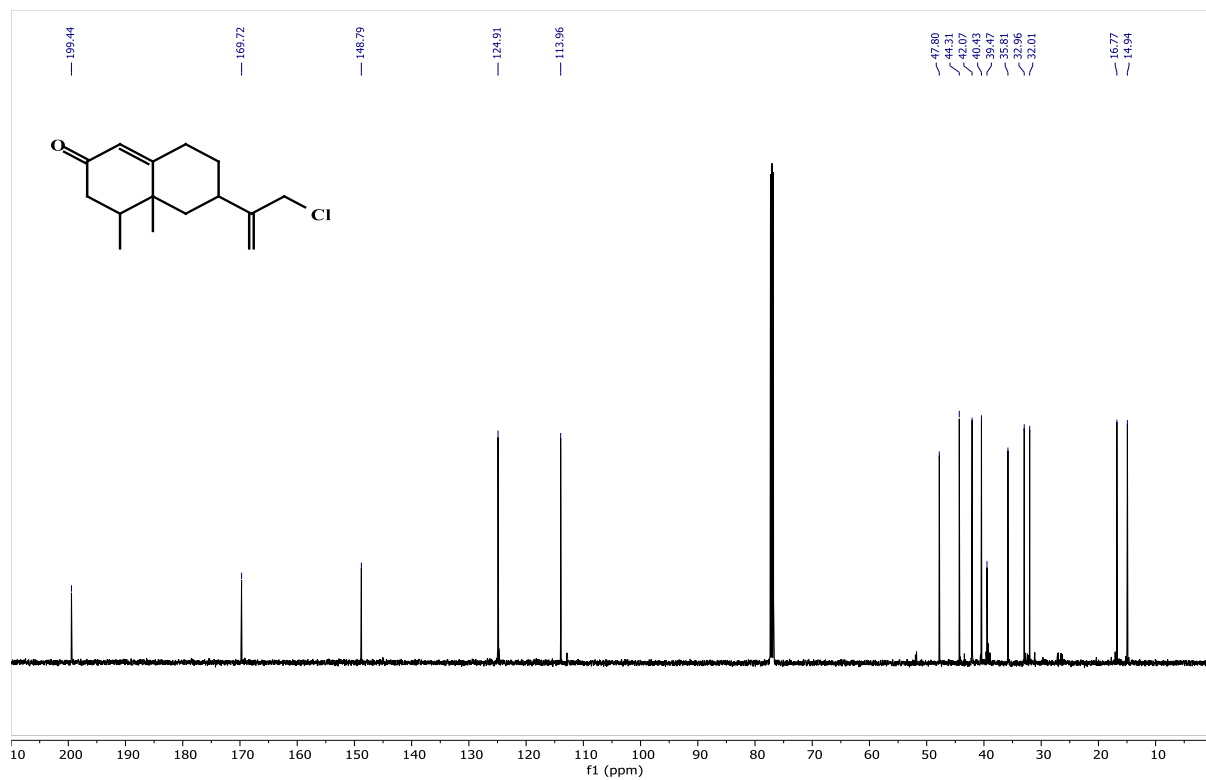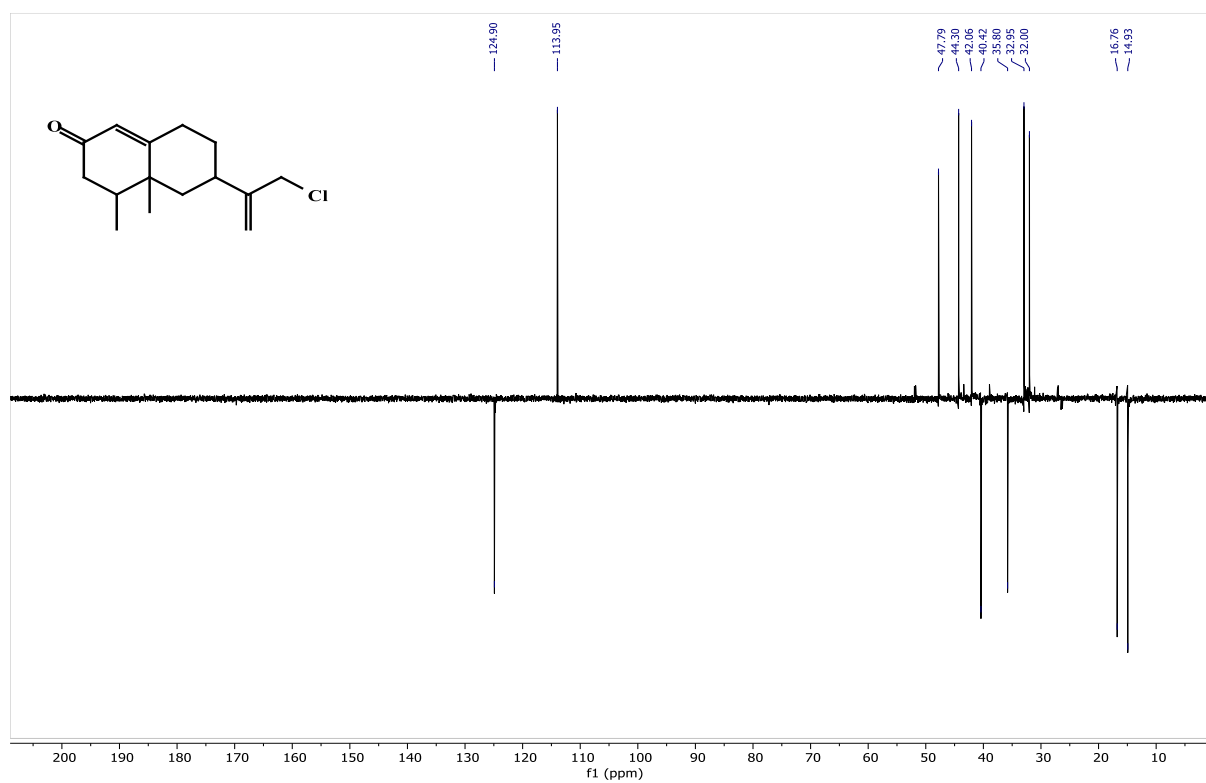

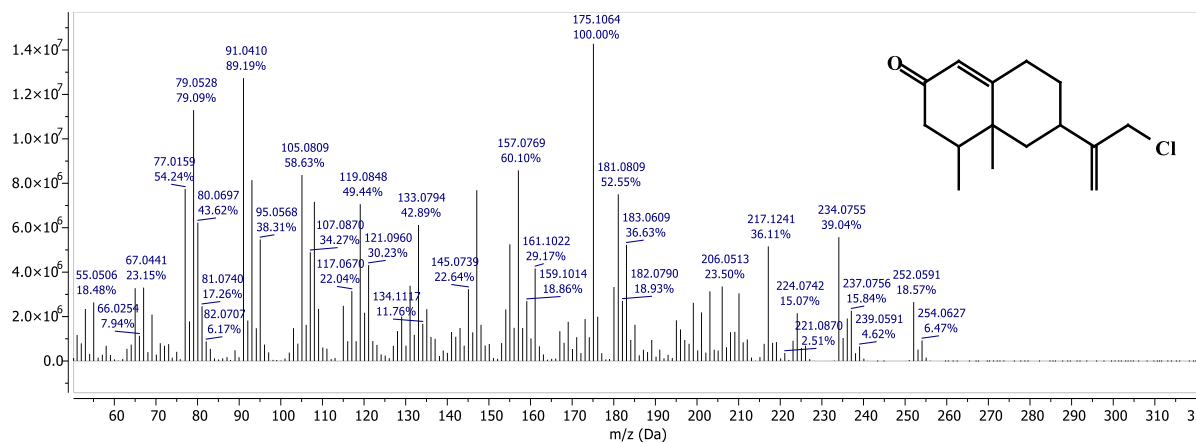

Figure S27: MS spectrum of the nootkatone monochloride **j**.

- Nootkatone vinyl allyl dichloride **k**

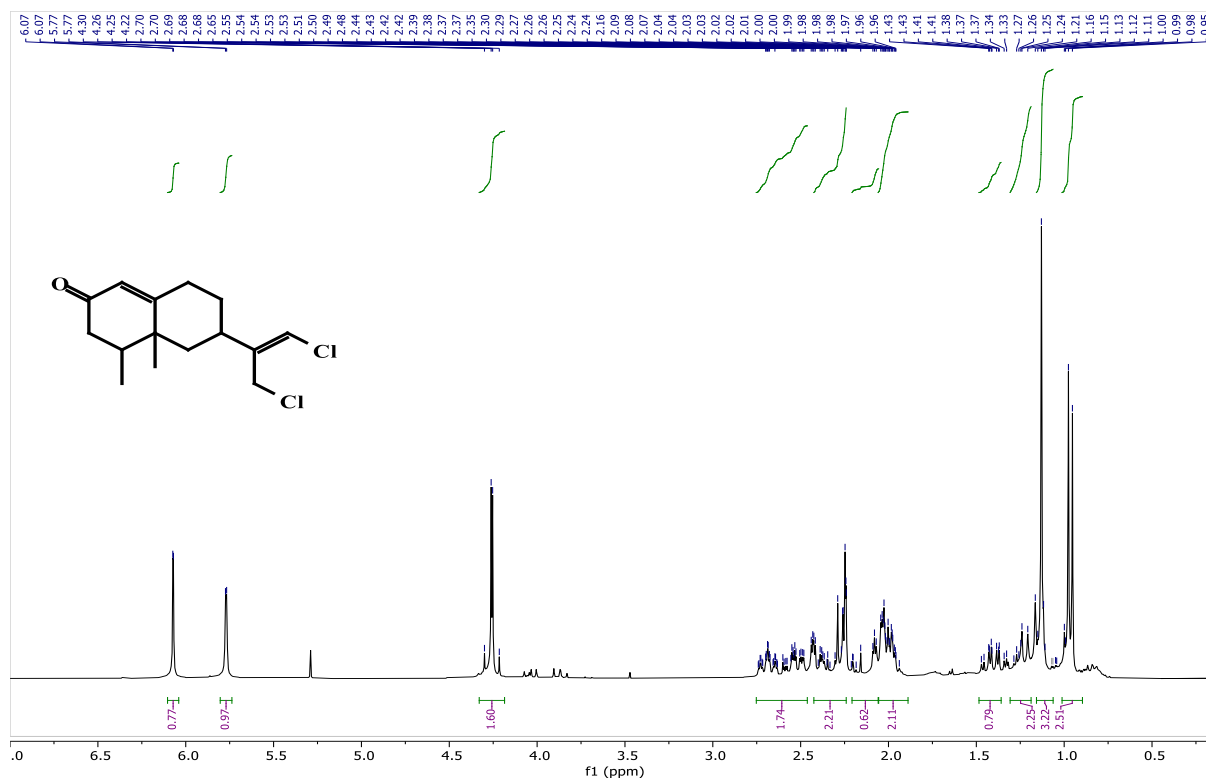

Figure S28: <sup>1</sup>H NMR spectrum of the nootkatone vinyl allyl dichloride **k**.

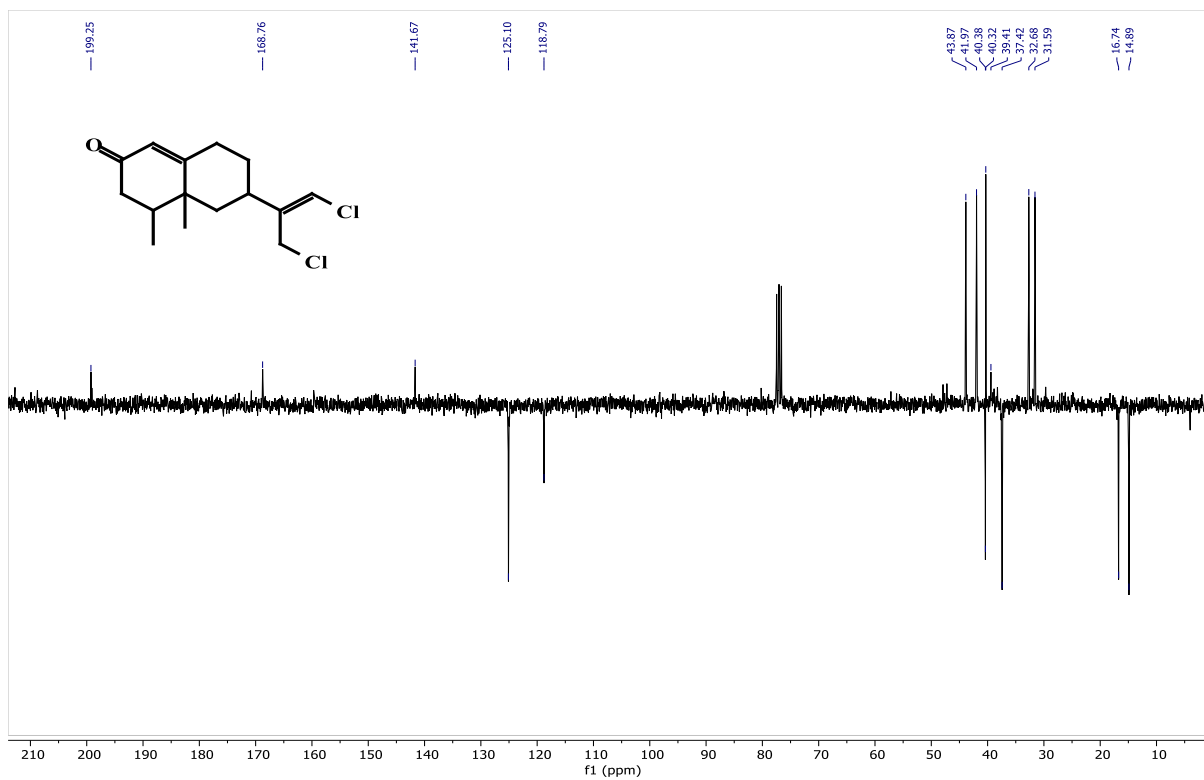

Figure S29: APT spectrum of the nootkatone vinyl allyl dichloride k.

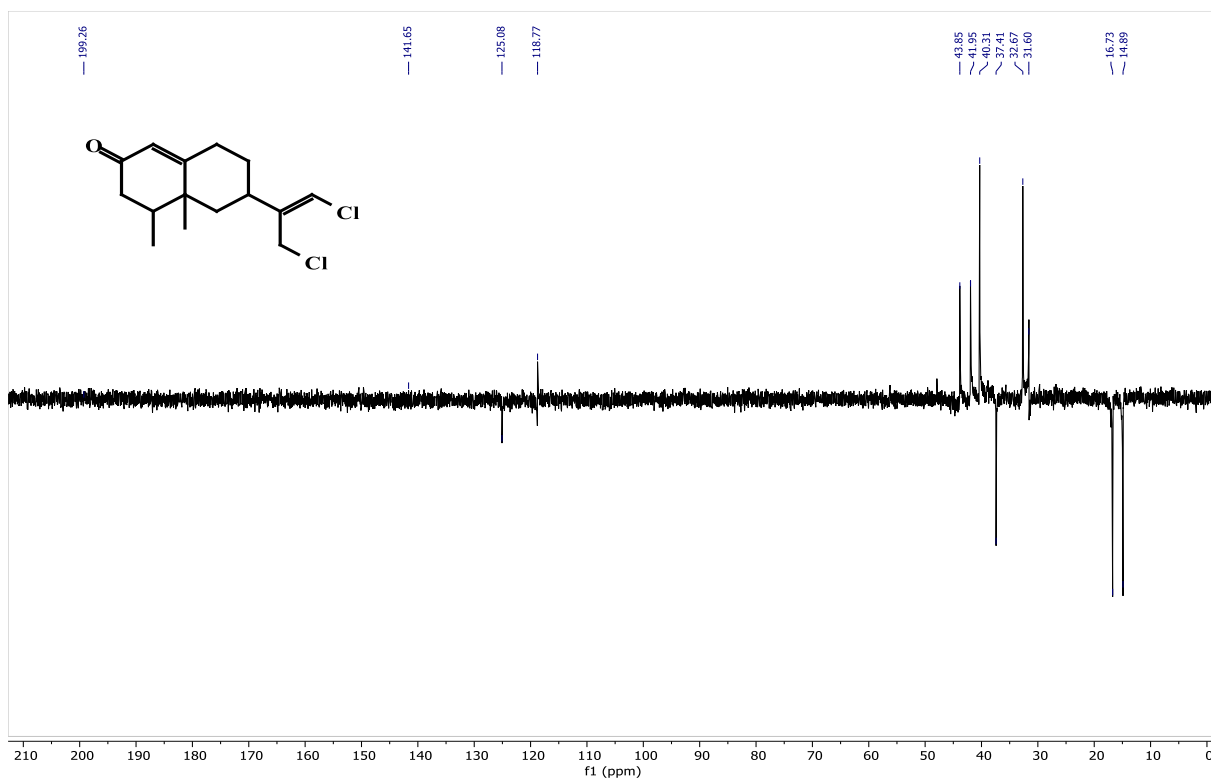

Figure S30: DEPT 135 spectrum of the nootkatone vinyl allyl dichloride k.

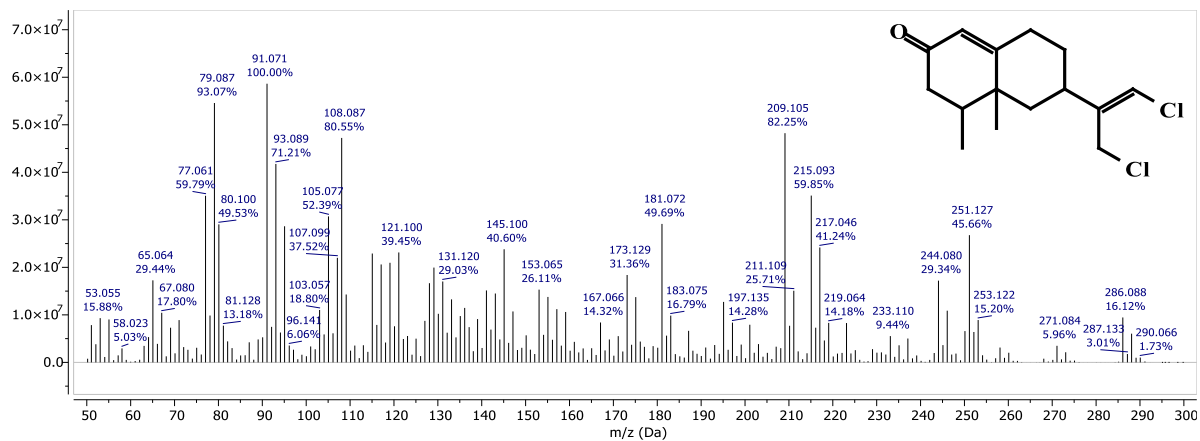

Figure S31: MS spectrum of the nootkatone vinyl allyl dichloride **k**.

- Nootkatone dichloride **l**

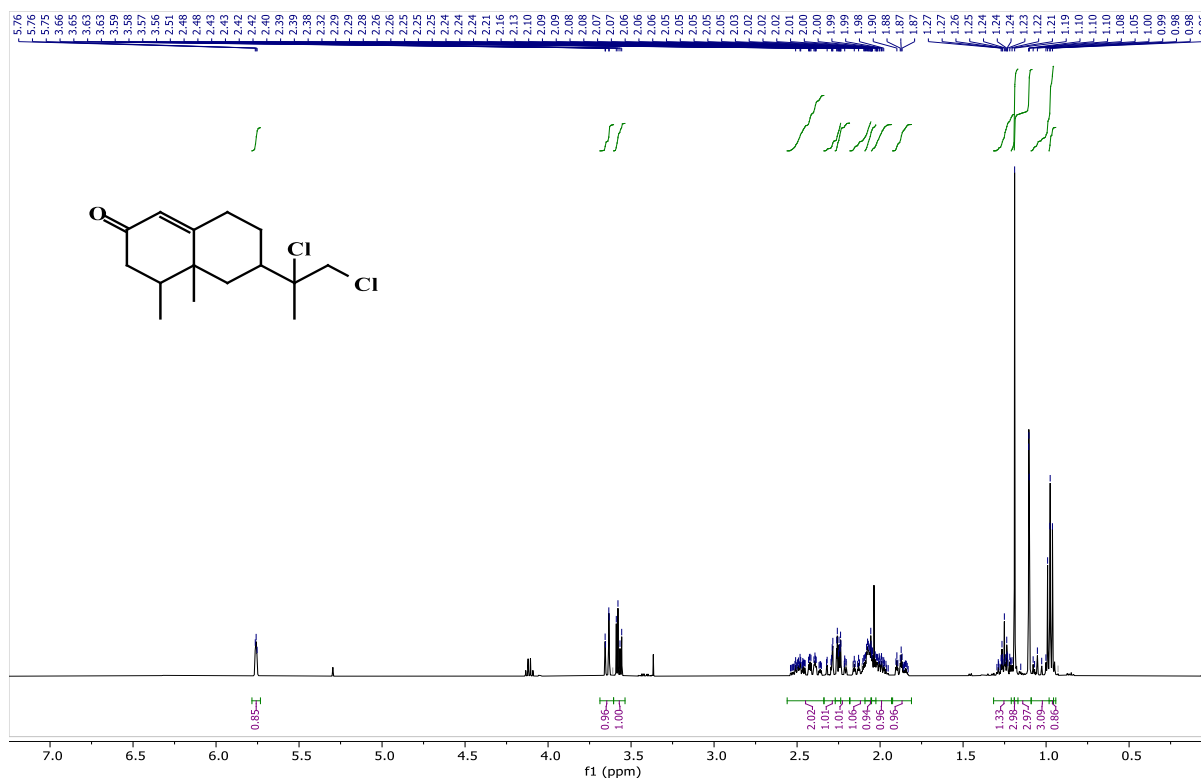

Figure S32:  $^1\text{H}$  NMR spectrum of the nootkatone dichloride **l**.

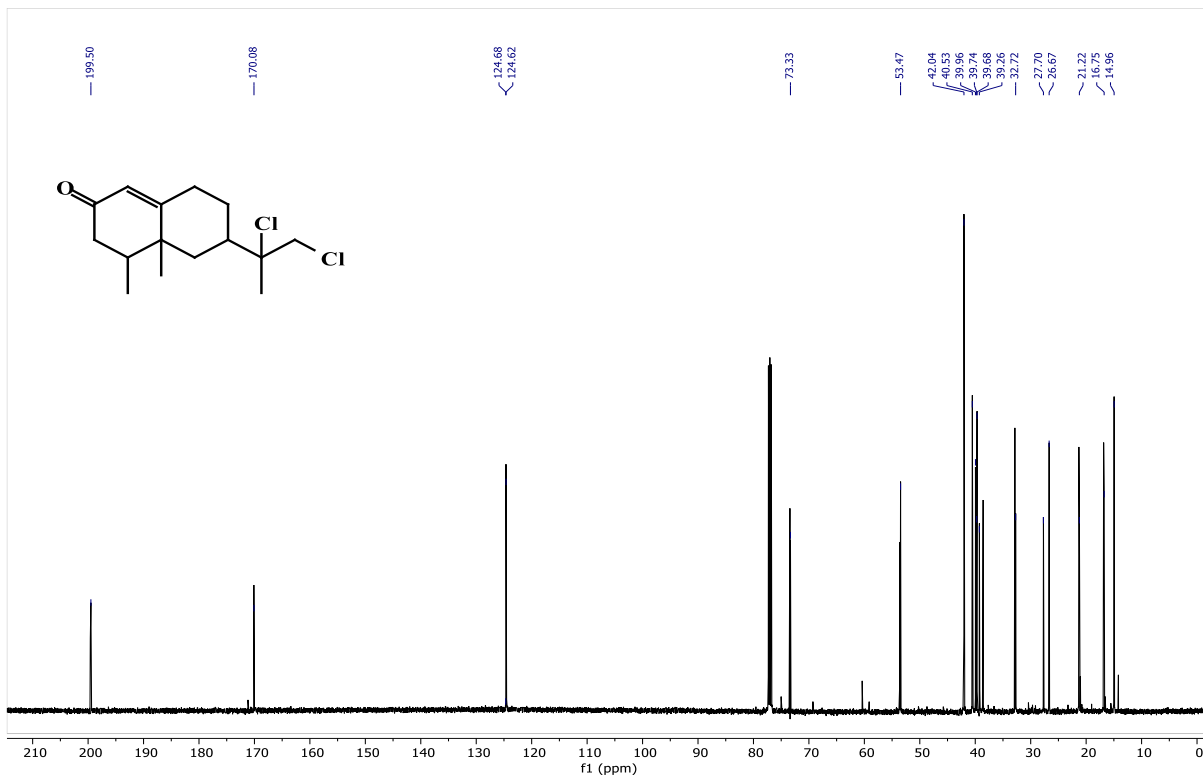

**Figure S33:**  $^{13}\text{C}$  spectrum of the nootkatone dichloride **1**.

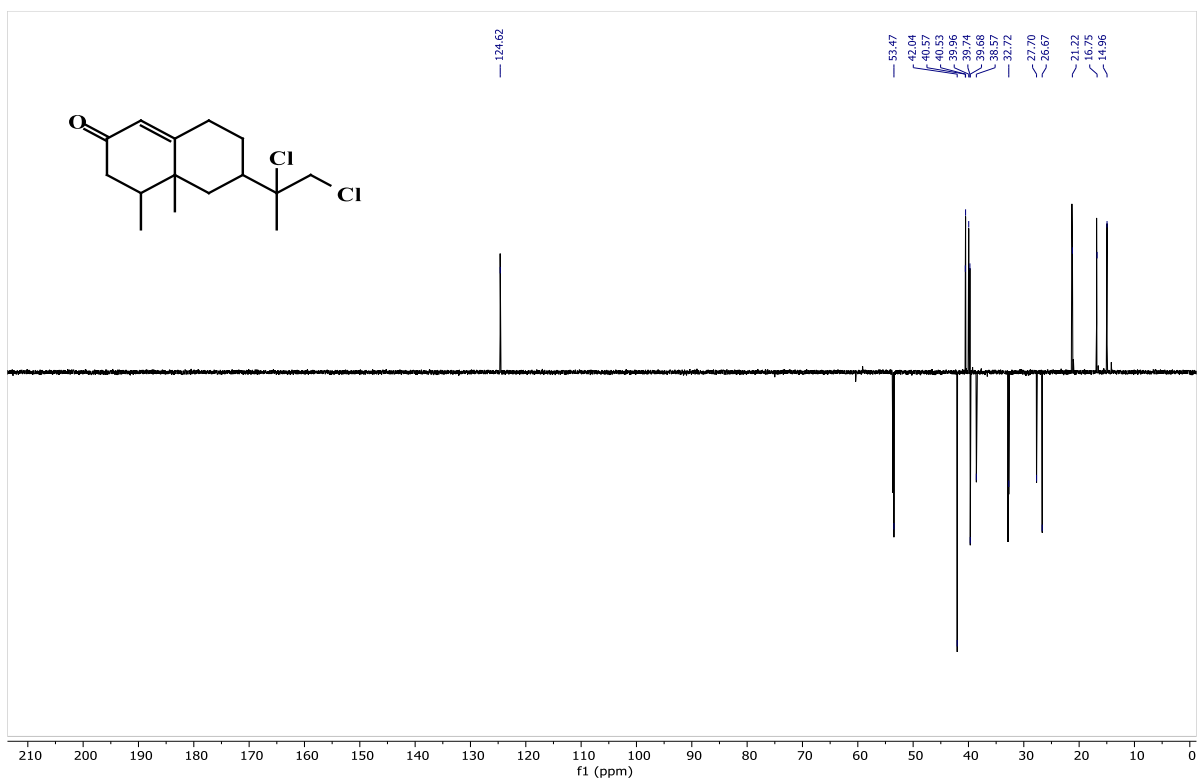

**Figure S34:** DEPT 135 spectrum of the nootkatone dichloride **1**.

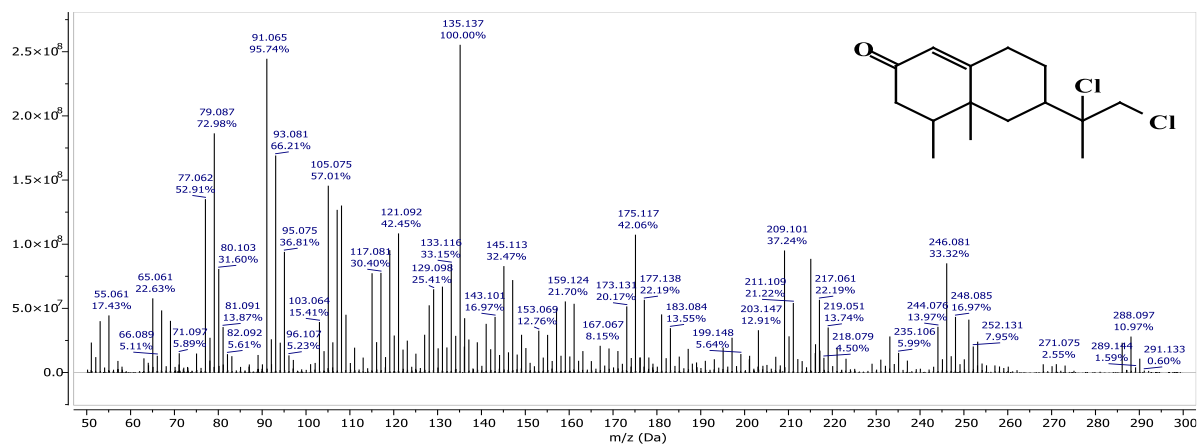

Figure S35: MS spectrum of the nootkatone dichloride **I**.

➤ Derivatives of pulegone **m**

• Pulegone monochloride **n**

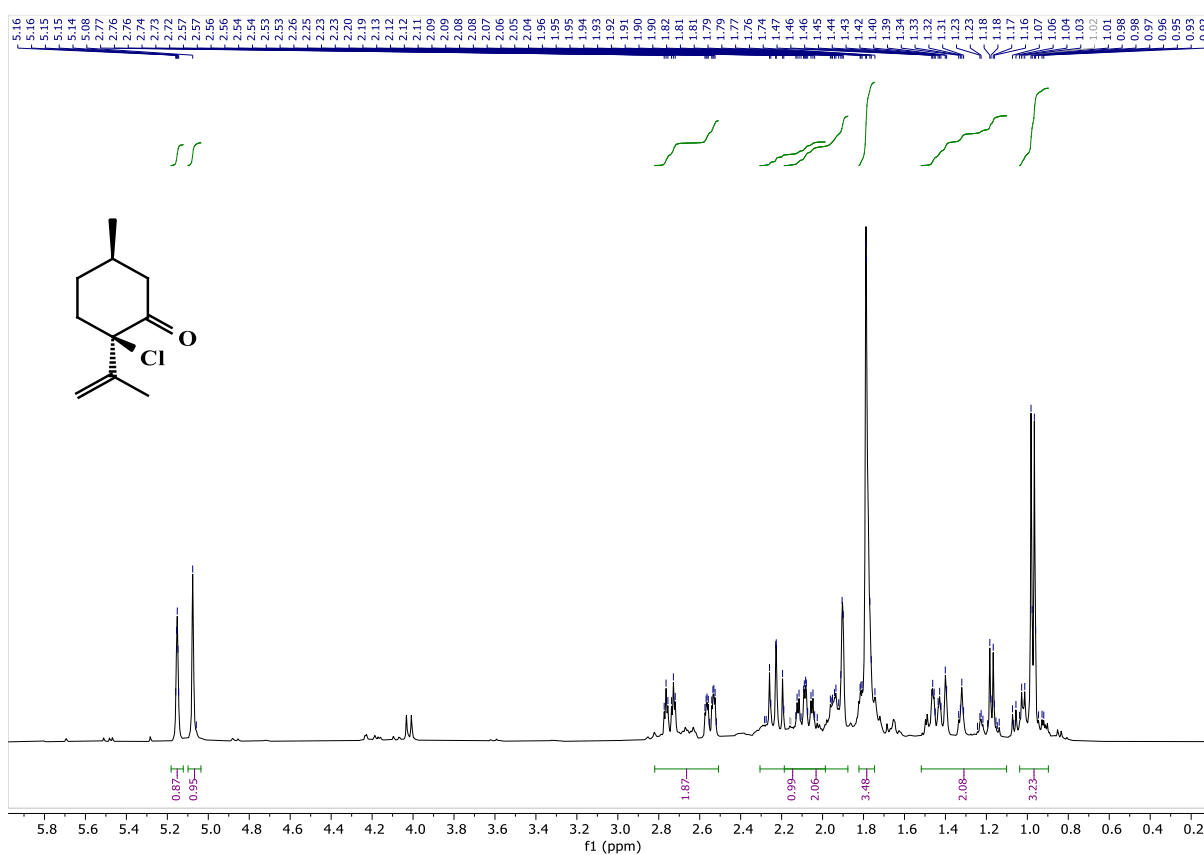

Figure S36: <sup>1</sup>H NMR spectrum of the pulegone monochloride **n**.

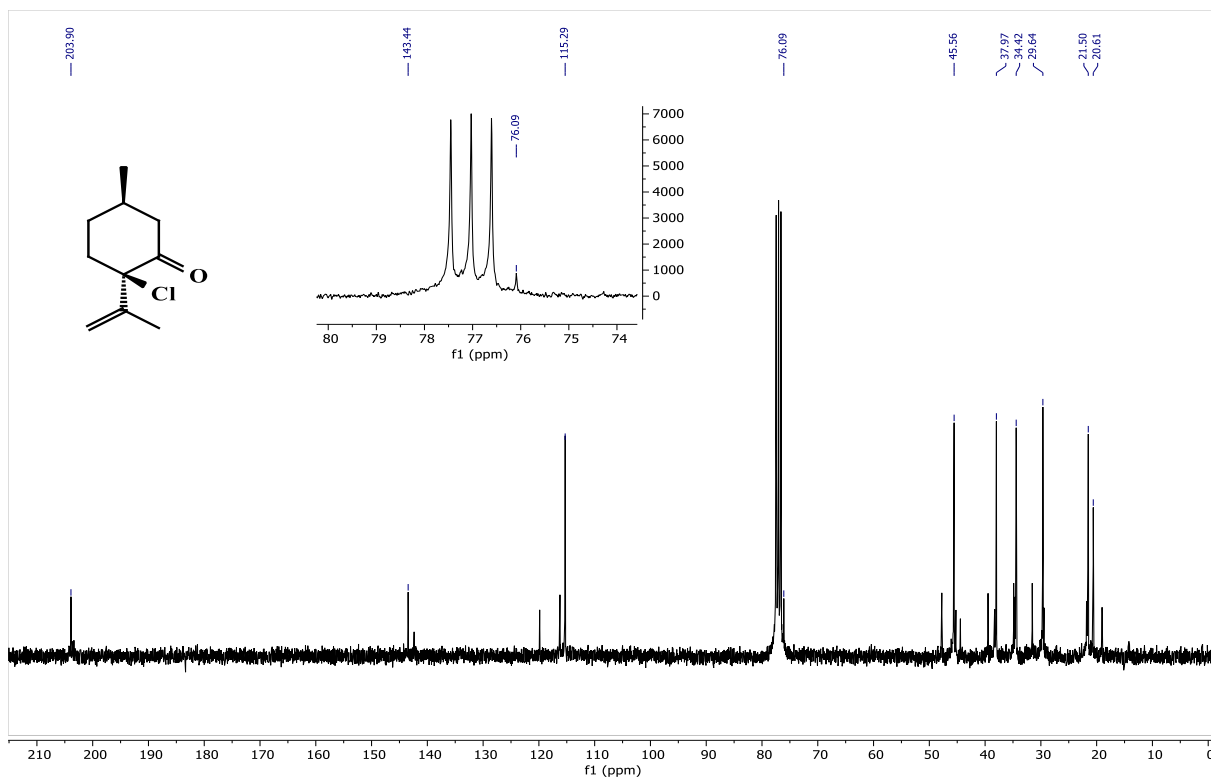

Figure S37:  $^{13}\text{C}$  spectrum of the pulegone monochloride **n**.

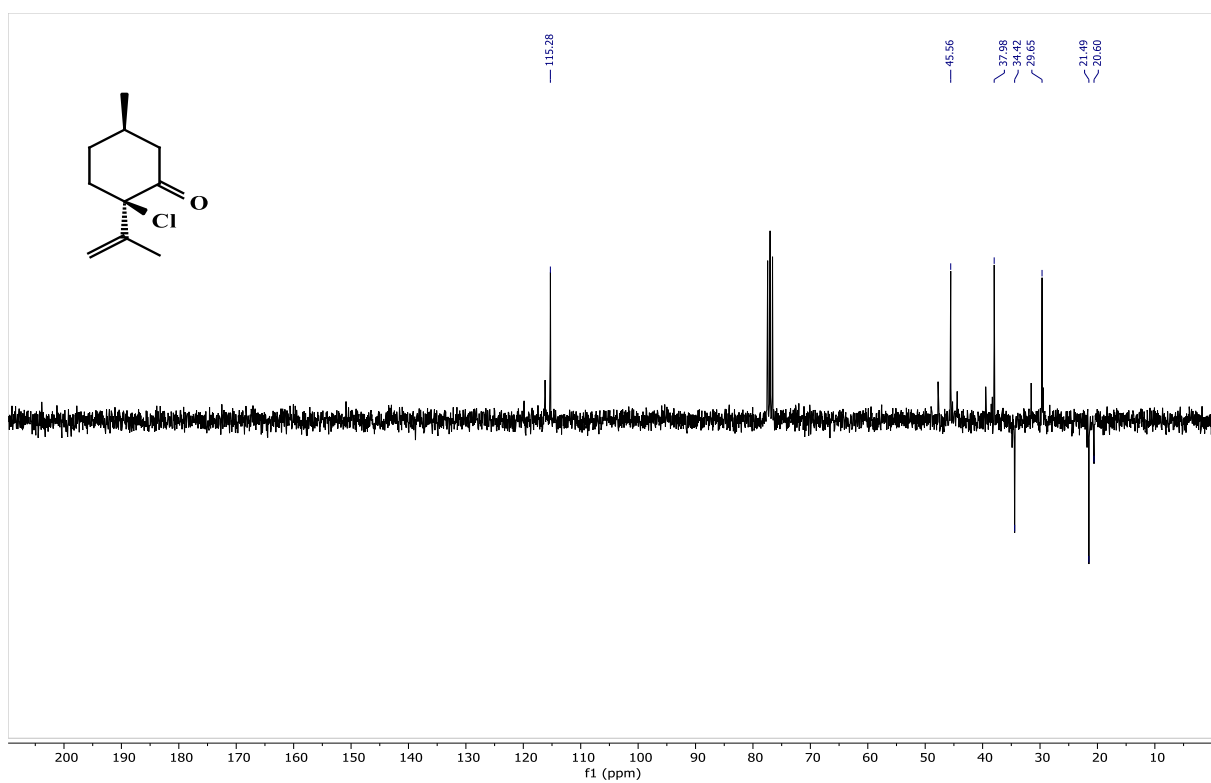

Figure S38: APT spectrum of the pulegone monochloride **n**.

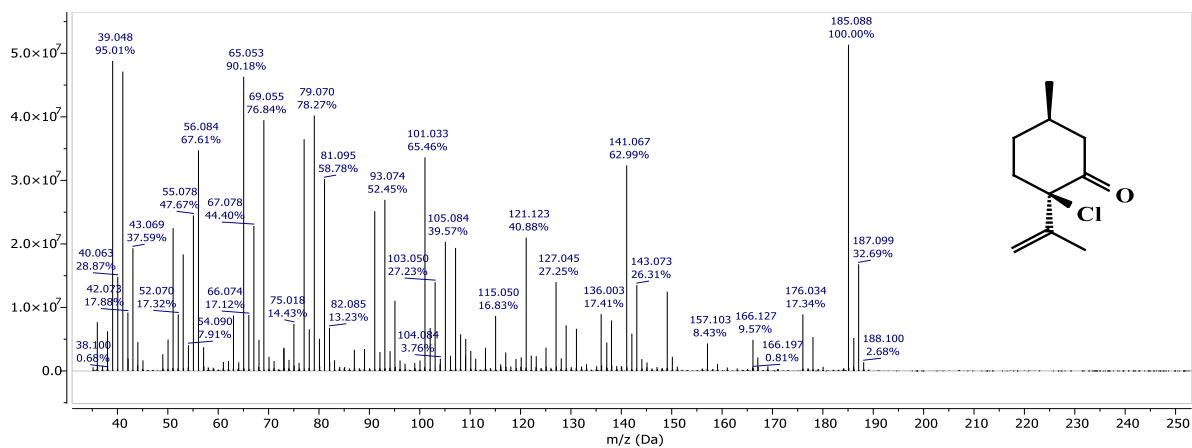

Figure S39: MS spectrum of the pulegone monochloride **n**.

- Pulegone monochloride **n'**

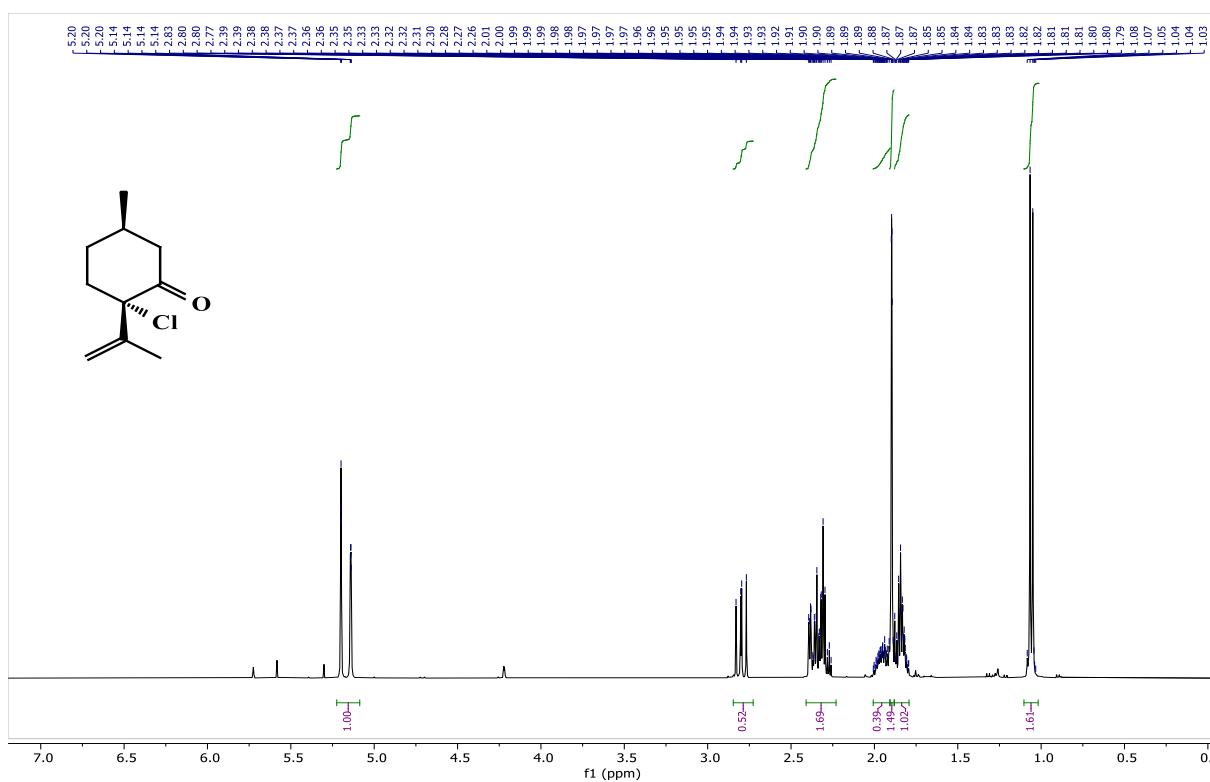

Figure S40: <sup>1</sup>H NMR spectrum of the pulegone monochloride **n'**.



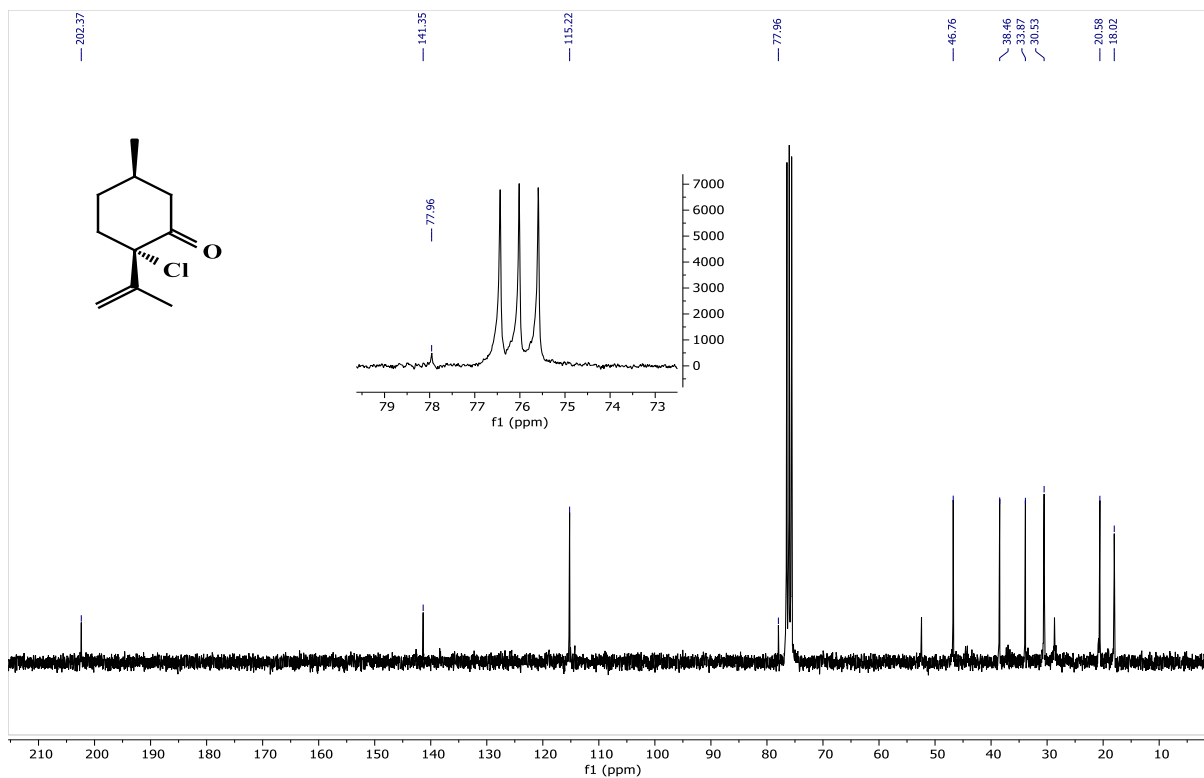

Figure S41:  $^{13}\text{C}$  spectrum of the pulegone monochloride n'.

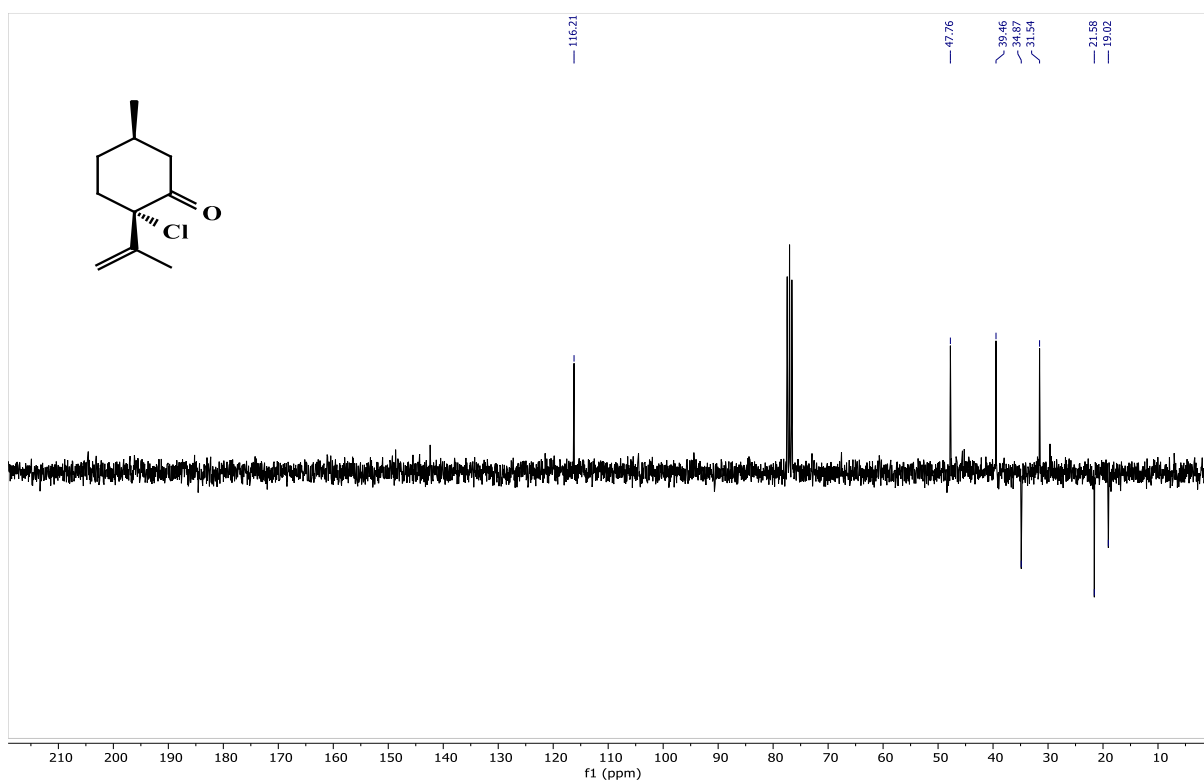

Figure S42: APT spectrum of the pulegone monochloride n'.

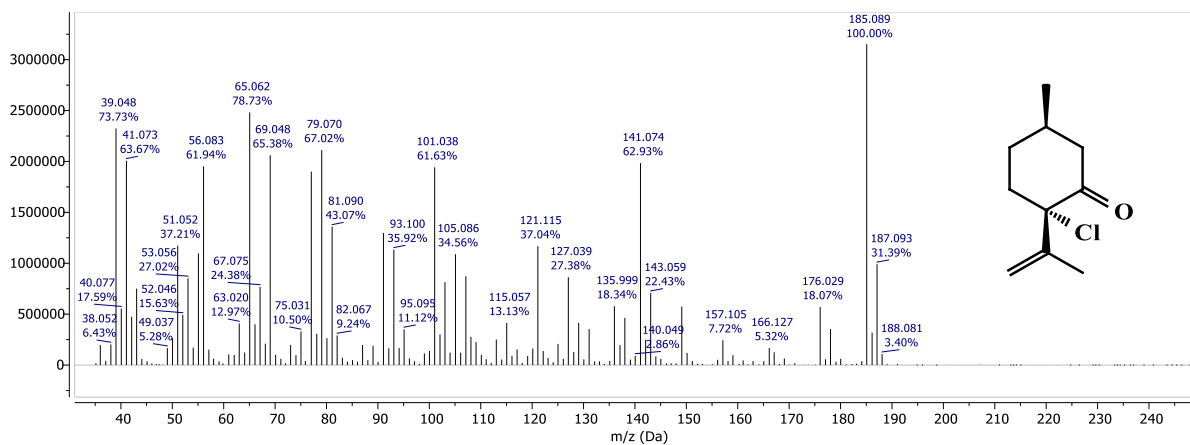

Figure S43: MS spectrum of the pulegone monochloride **n'**.

- Pulegone allyl dichloride **o**

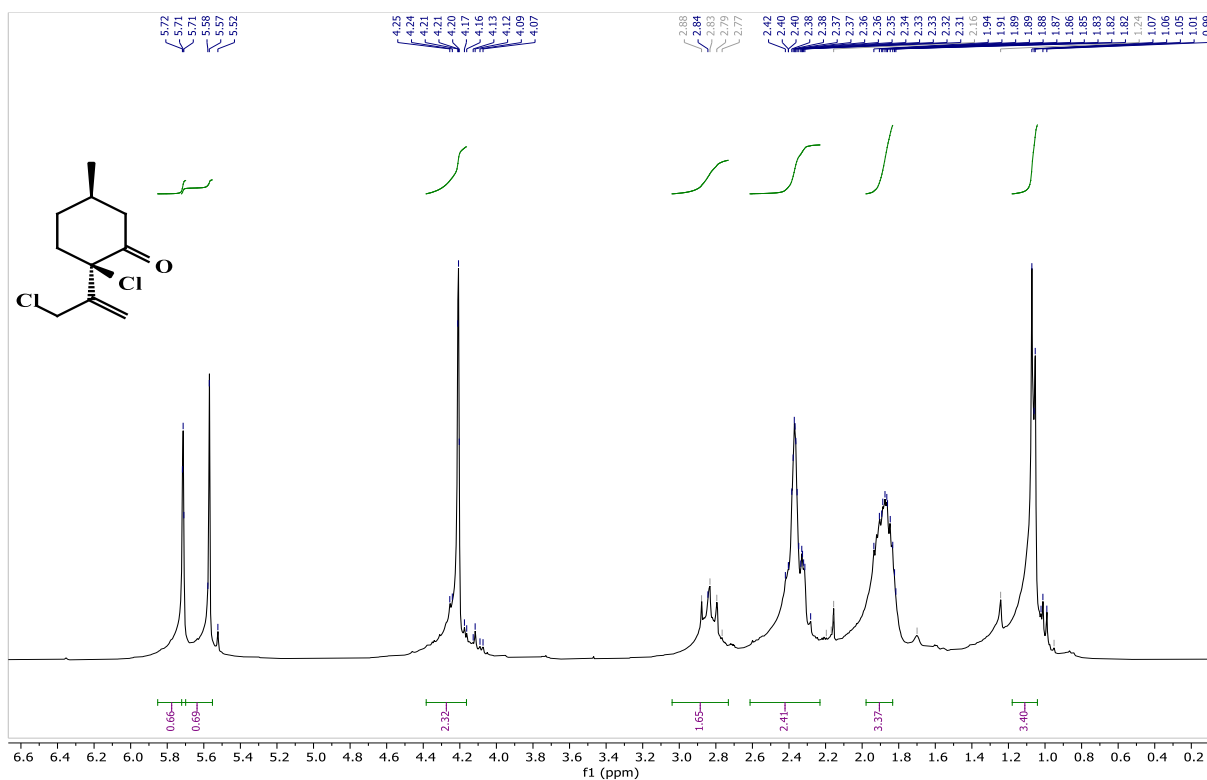

Figure S44: <sup>1</sup>H NMR spectrum of the pulegone vinyl allyl dichloride **o**.

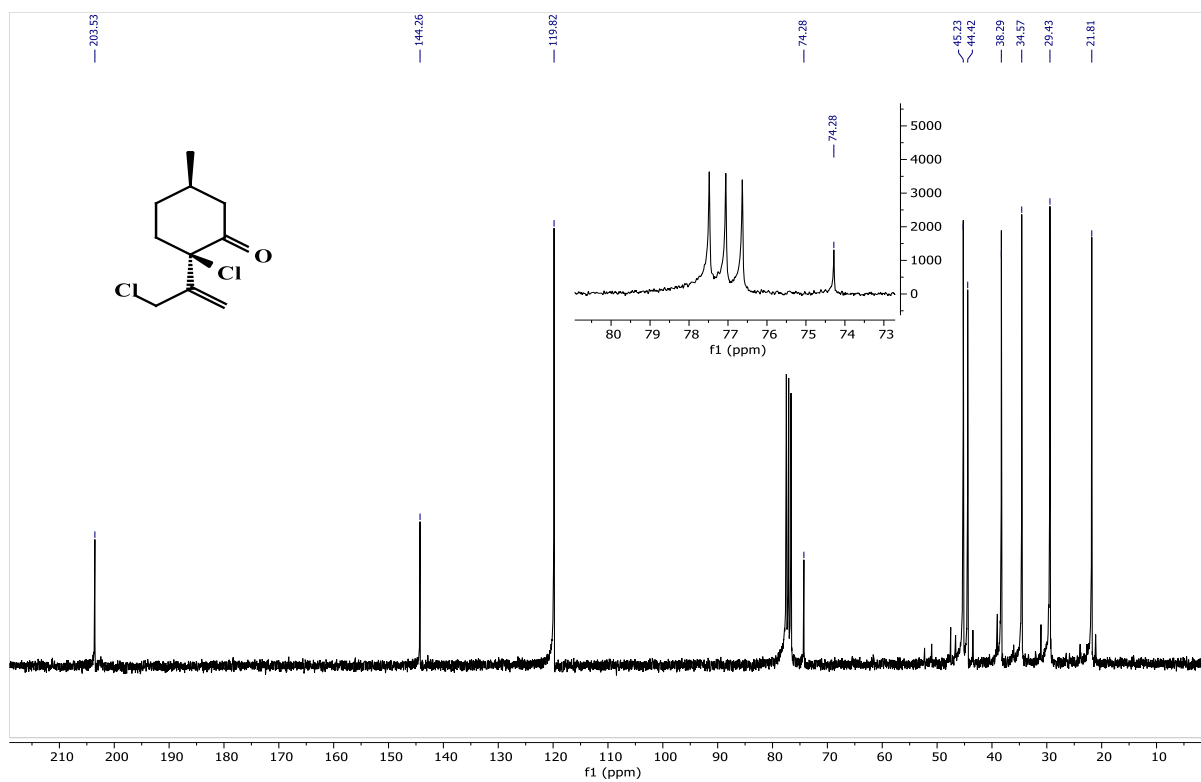

**Figure S45:** <sup>13</sup>C spectrum of the pulegone vinyl allyl dichloride **o**.

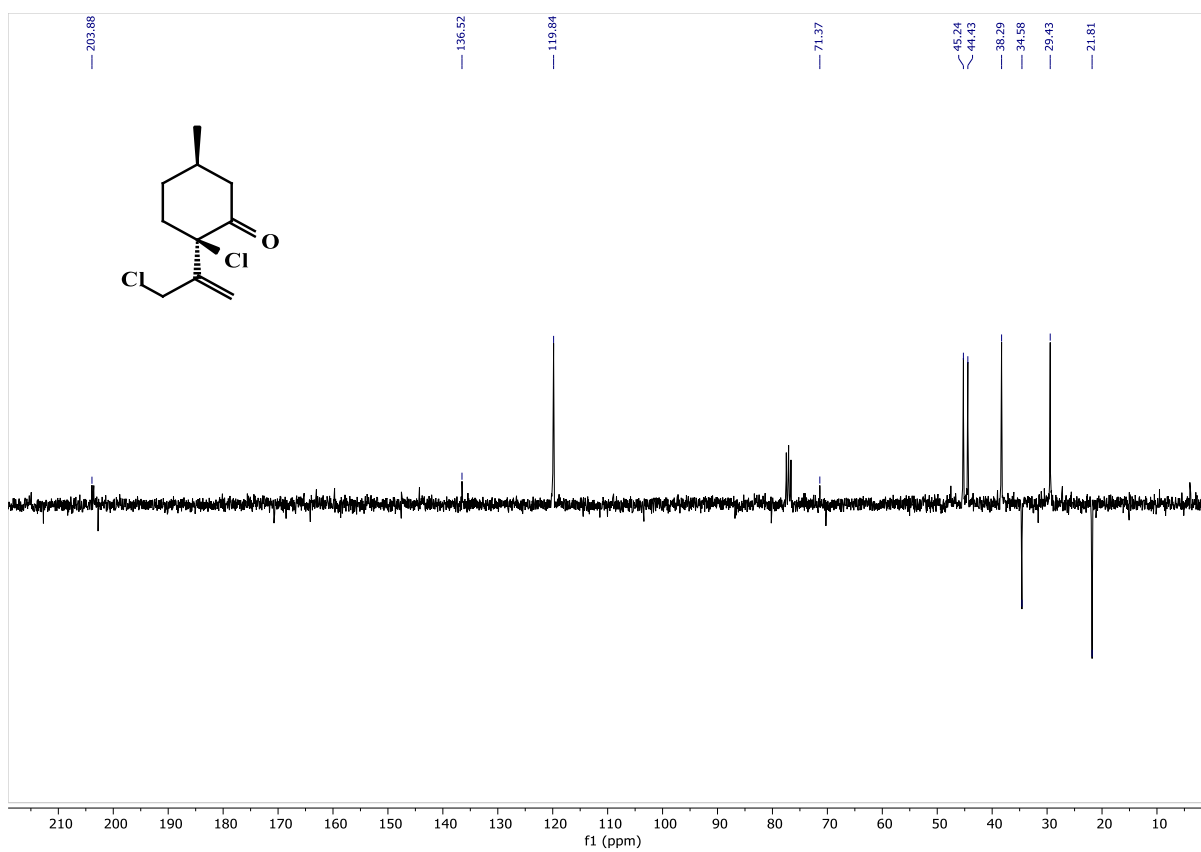

**Figure S46:** APT spectrum of the pulegone vinyl allyl dichloride **o**.

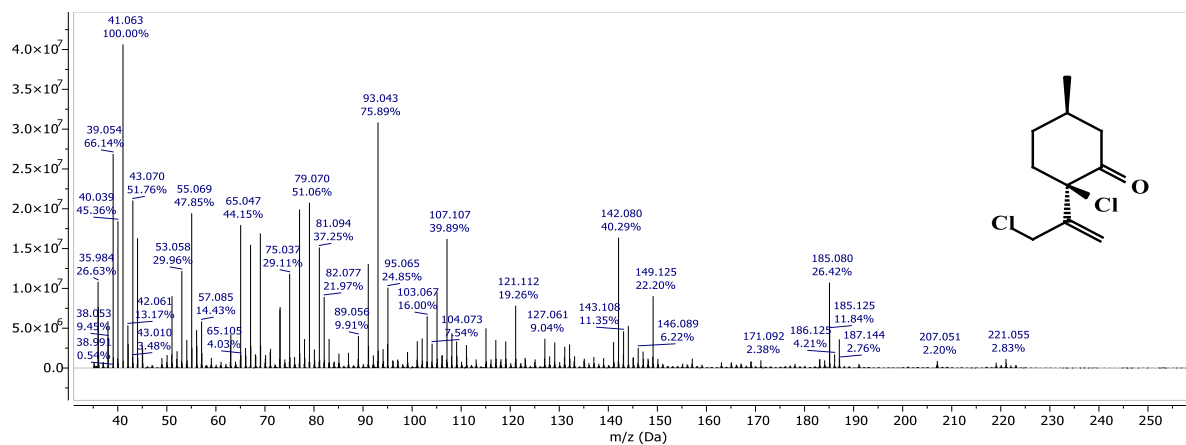

Figure S47: MS spectrum of the pulegone vinyl allyl dichloride **9**.

- Pulegone allyl dichloride **9'**

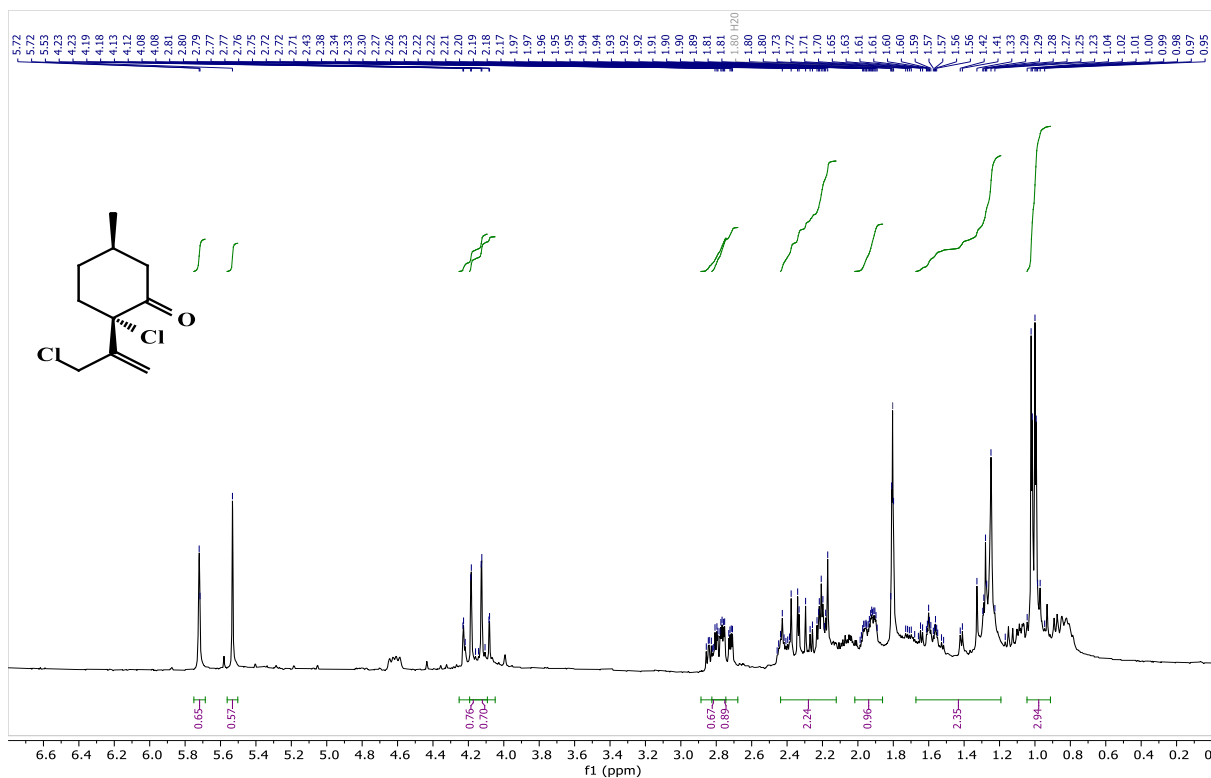

Figure S48:  $^1\text{H}$  NMR spectrum of the pulegone vinyl allyl dichloride **9'**.

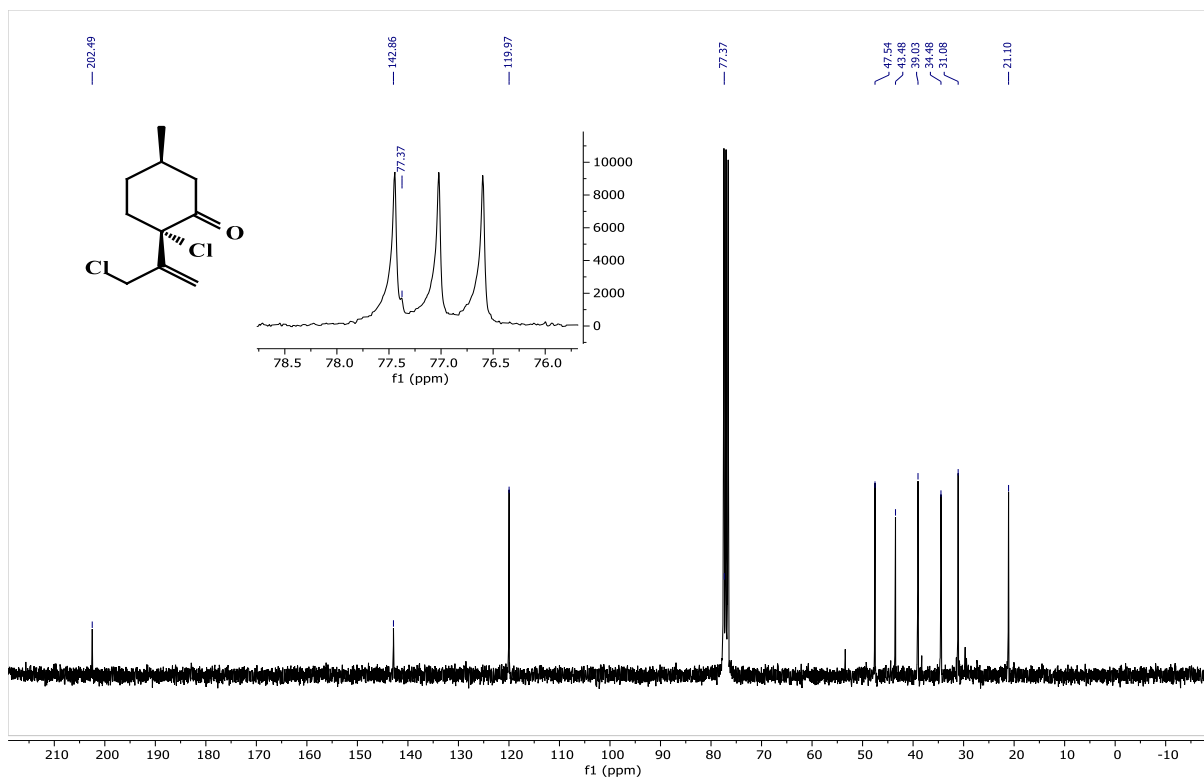

Figure S49:  $^{13}\text{C}$  spectrum of the pulegone vinyl allyl dichloride o'.

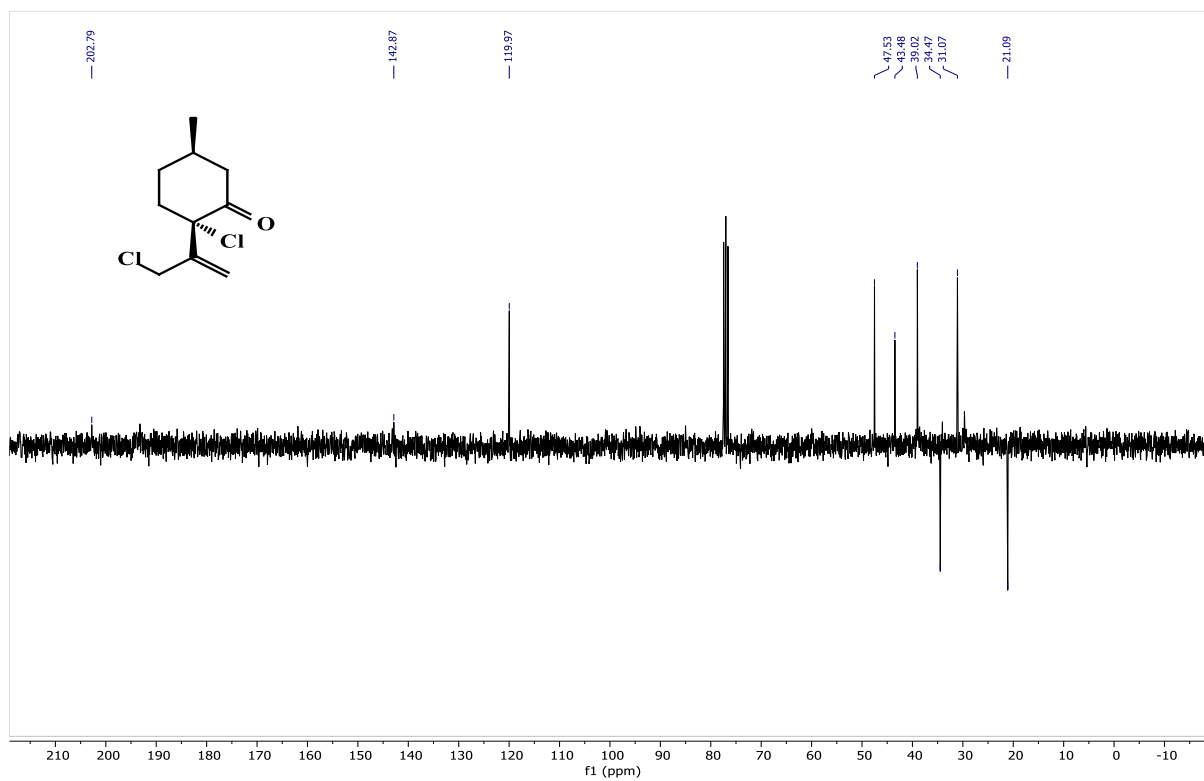

Figure S50: APT spectrum of the pulegone vinyl allyl dichloride o'.

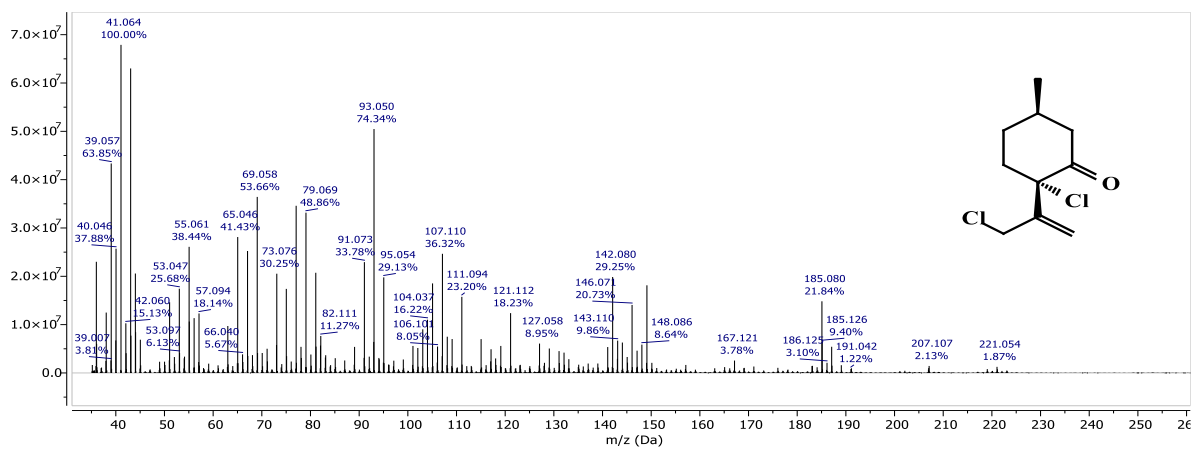

Figure S51: MS spectrum of the pulegone vinyl allyl dichloride **o'**.

➤ Derivatives of both perillyl aldehyde **p** and perillyl alcohol **s**

- Perillyl aldehyde monochloride **q**

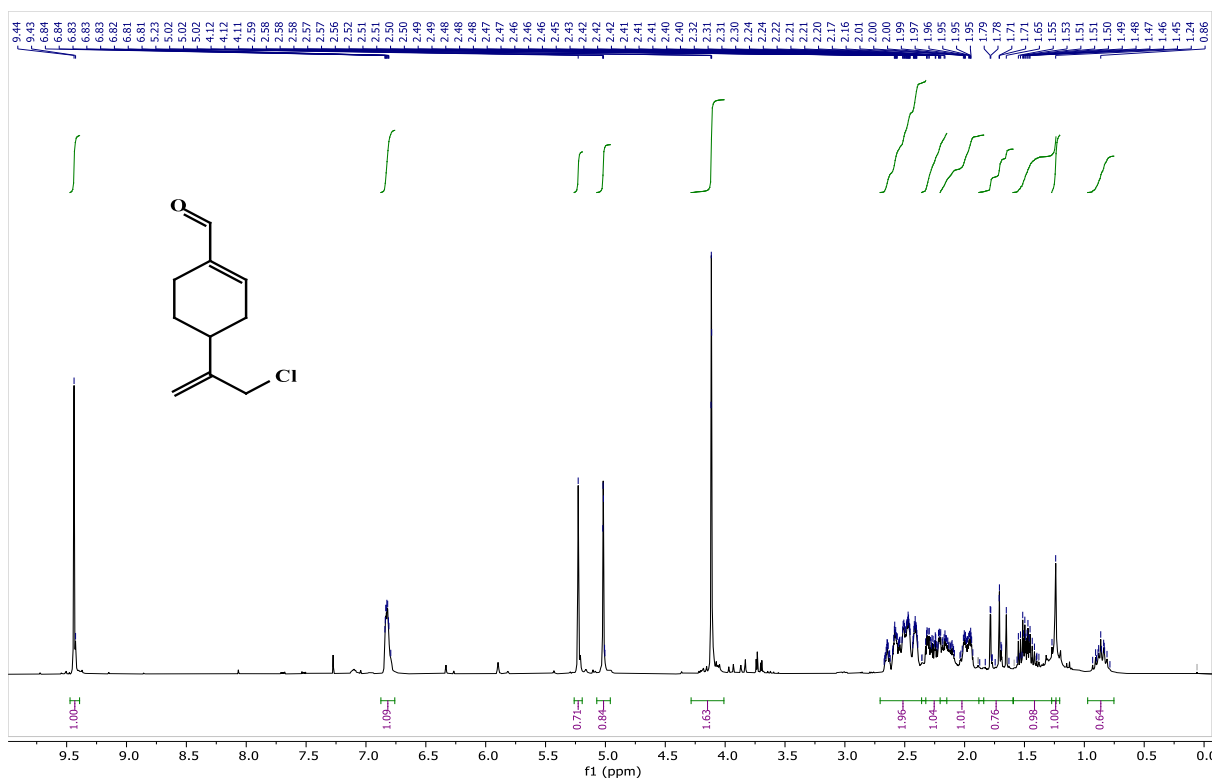

Figure S52:  $^1\text{H}$  NMR spectrum of the perillyl aldehyde monochloride **q**.

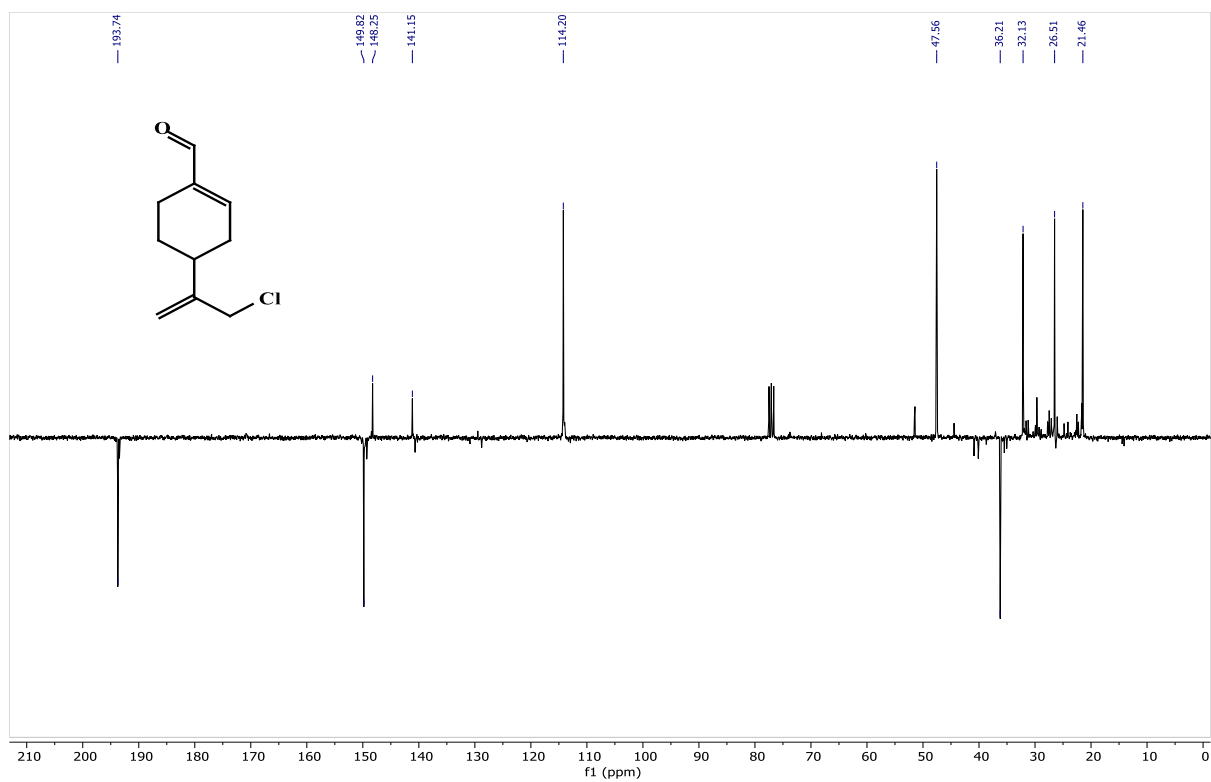

**Figure S53:** APT spectrum of the perillyl aldehyde monochloride **q**.

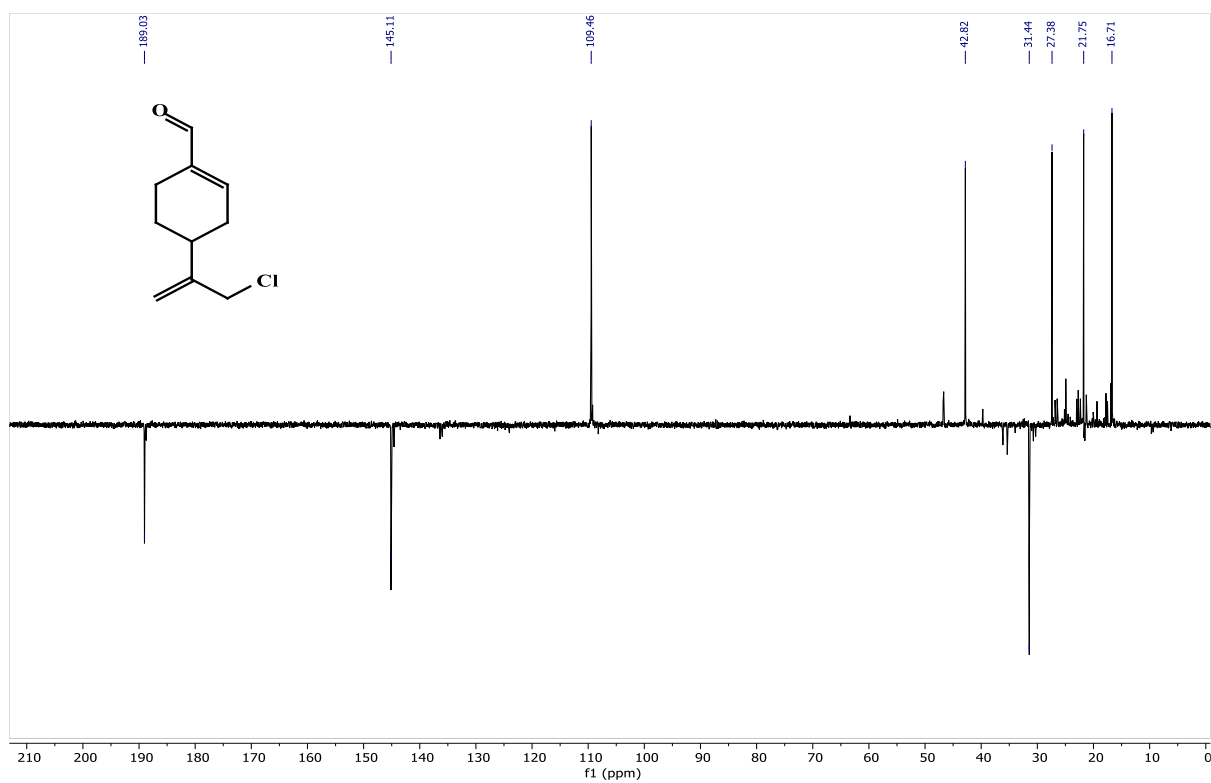

**Figure S54:** DEPT 135 spectrum of the perillyl aldehyde monochloride **q**.

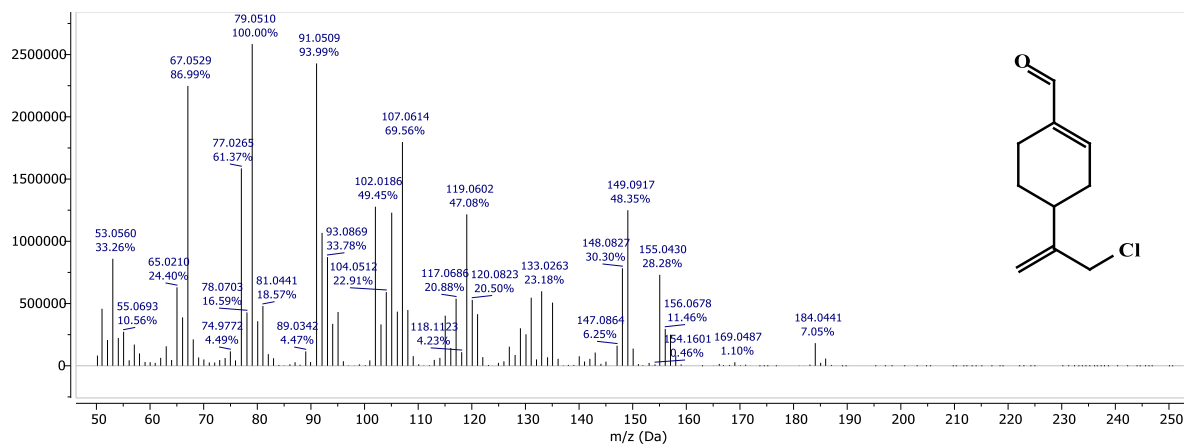

**Figure S55:** MS spectrum of the perillyl aldehyde monochloride **q**.

- Perillyl aldehyde vinyl allyl dichloride **r**

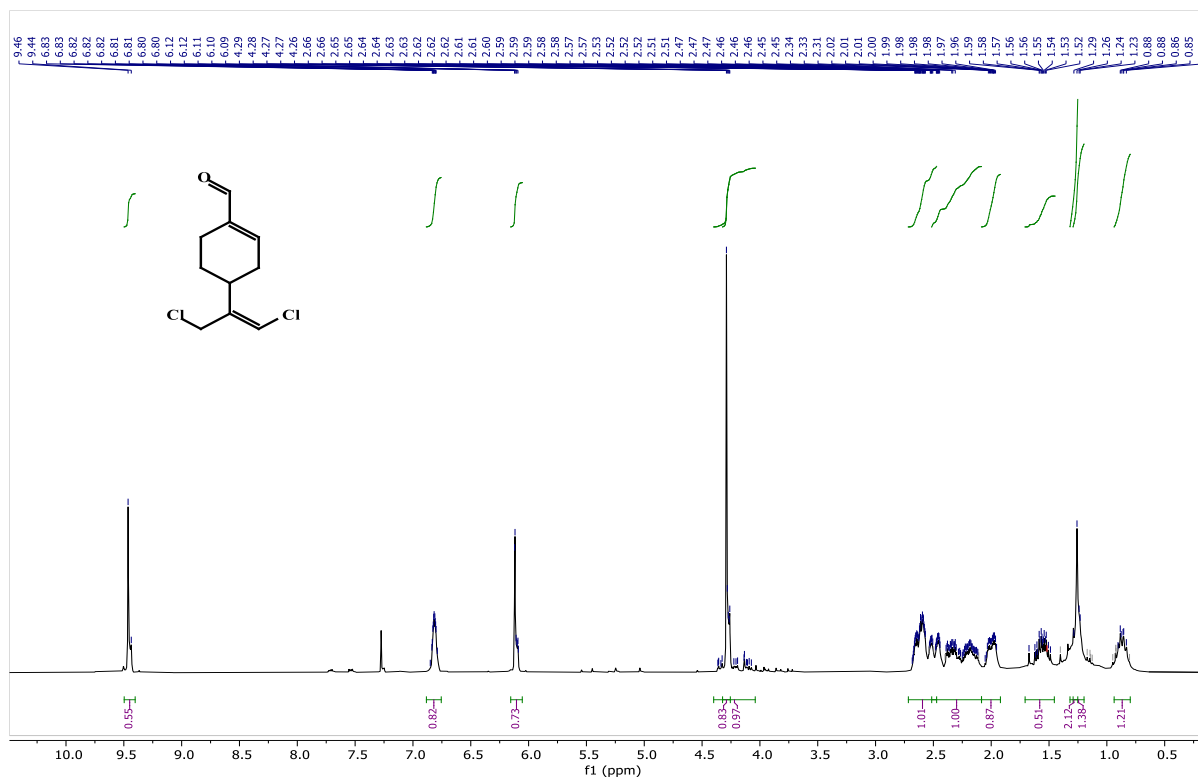

**Figure S56:**  $^1\text{H}$  NMR spectrum of the perillyl aldehyde vinyl allyl dichloride **r**.



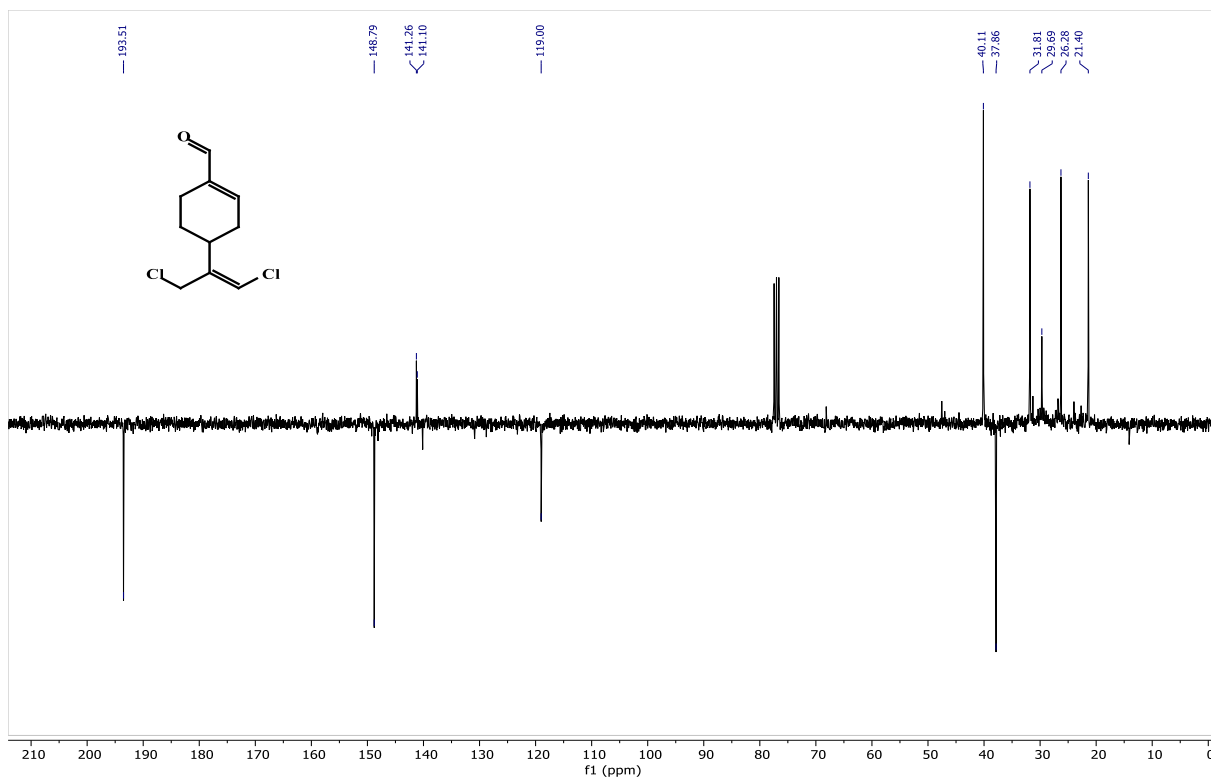

**Figure S57:** APT spectrum of the perillyl aldehyde vinyl allyl dichloride **r**.

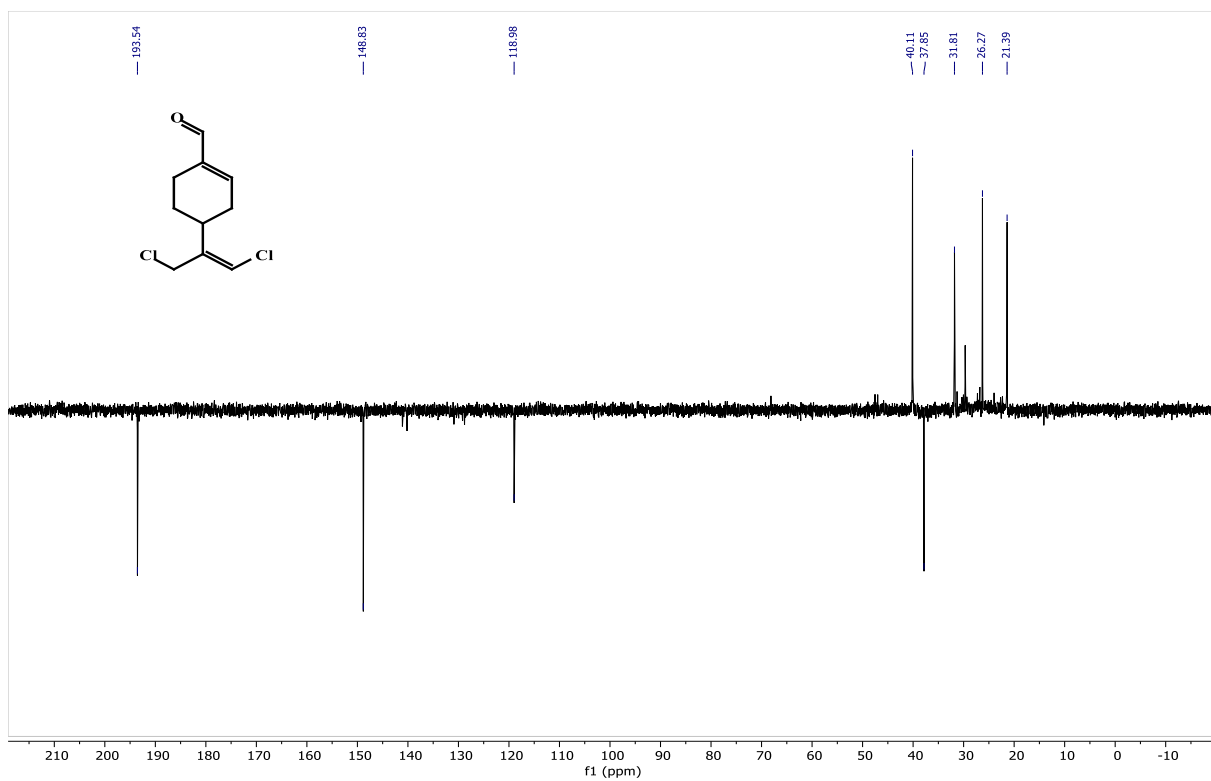

**Figure S58:** DEPT 135 spectrum of the perillyl aldehyde vinyl allyl dichloride **r**.

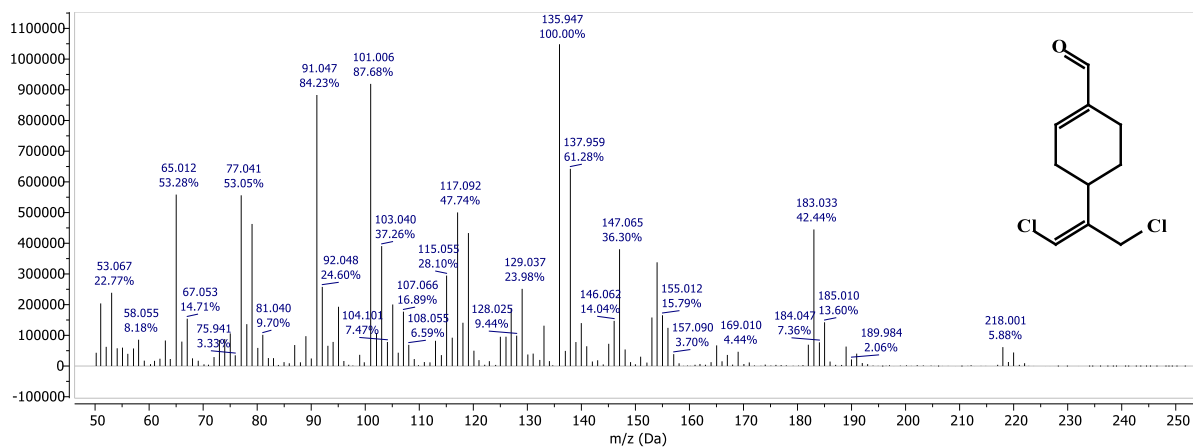

Figure S59: MS spectrum of the perillyl aldehyde vinyl allyl dichloride **r**.

➤ Derivatives of limona ketone **t**

- Limona ketone dichloride **u**

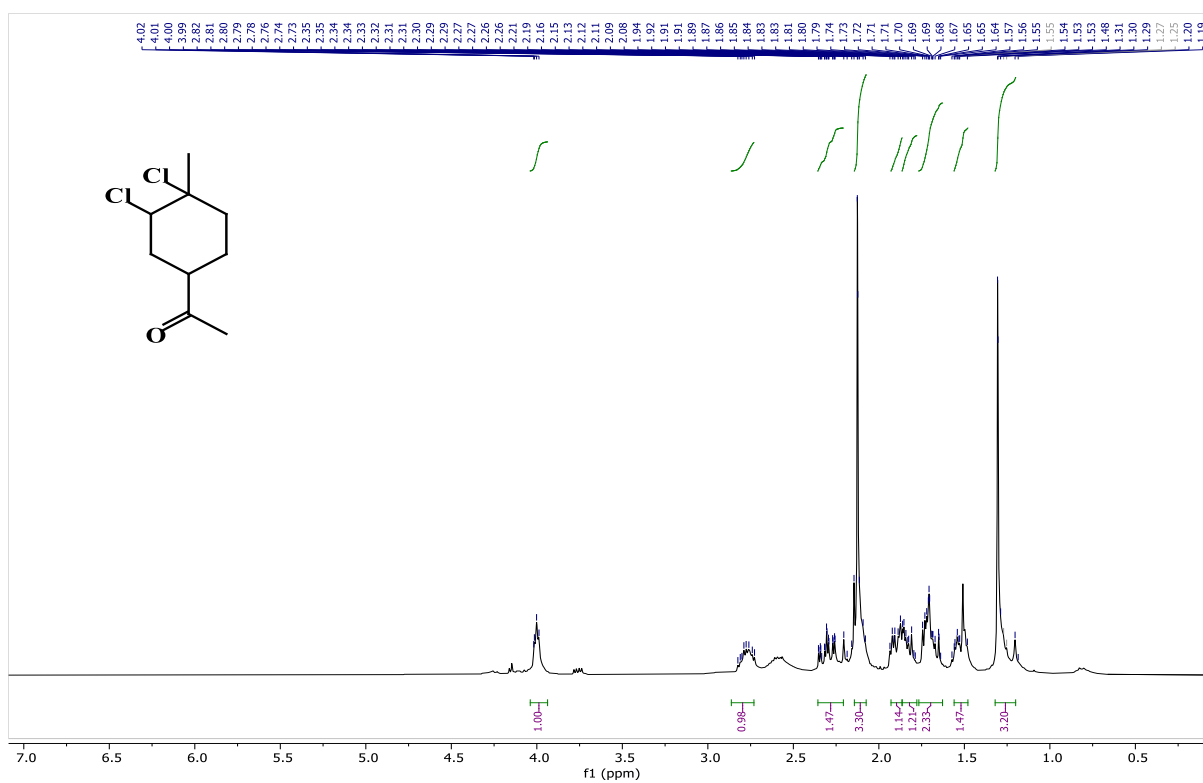

Figure S60:  $^1\text{H}$  NMR spectrum of the limona ketone dichloride **u**.

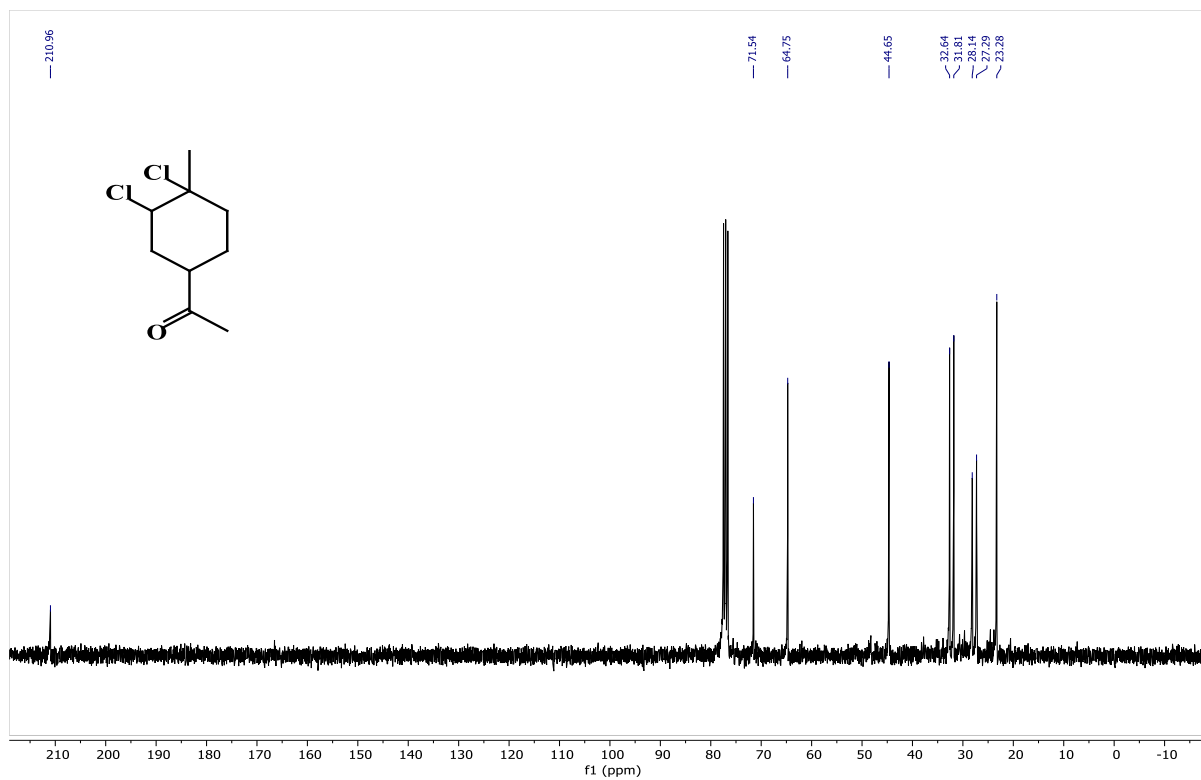

**Figure S61:**  $^{13}\text{C}$  spectrum of the limona ketone dichloride **u**.

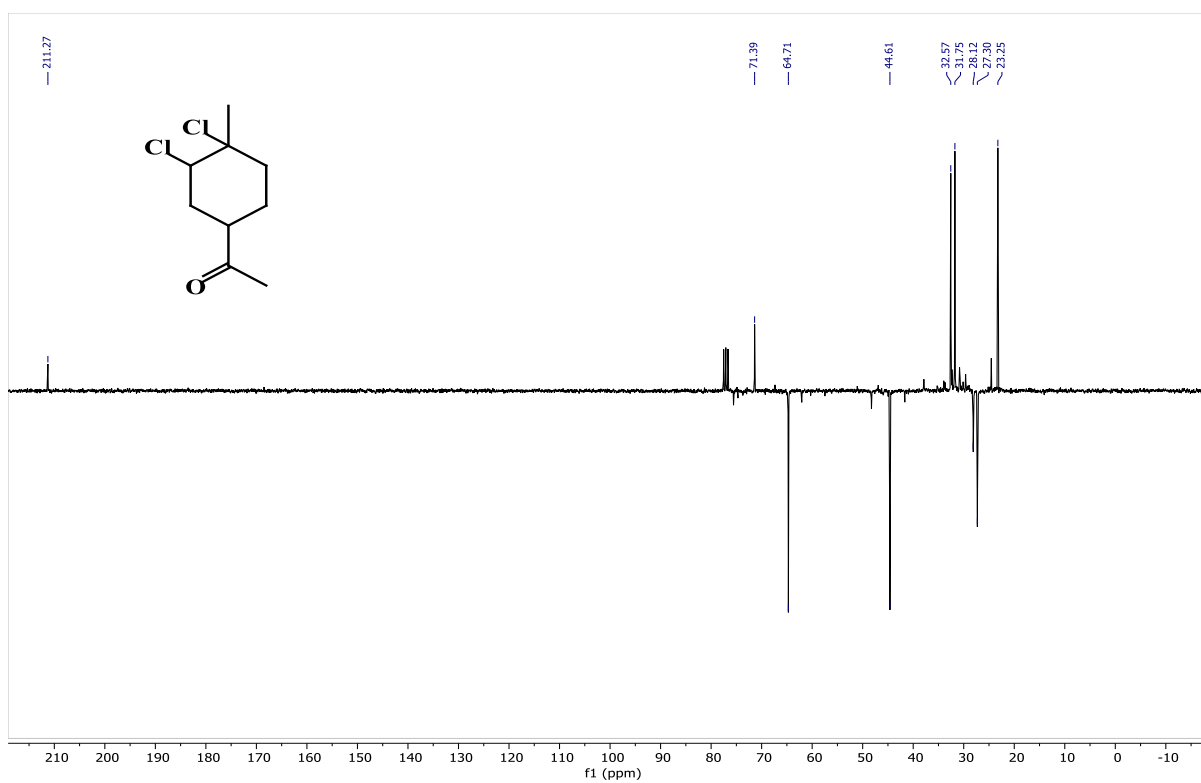

**Figure S62:** APT spectrum of the limona ketone dichloride **u**.

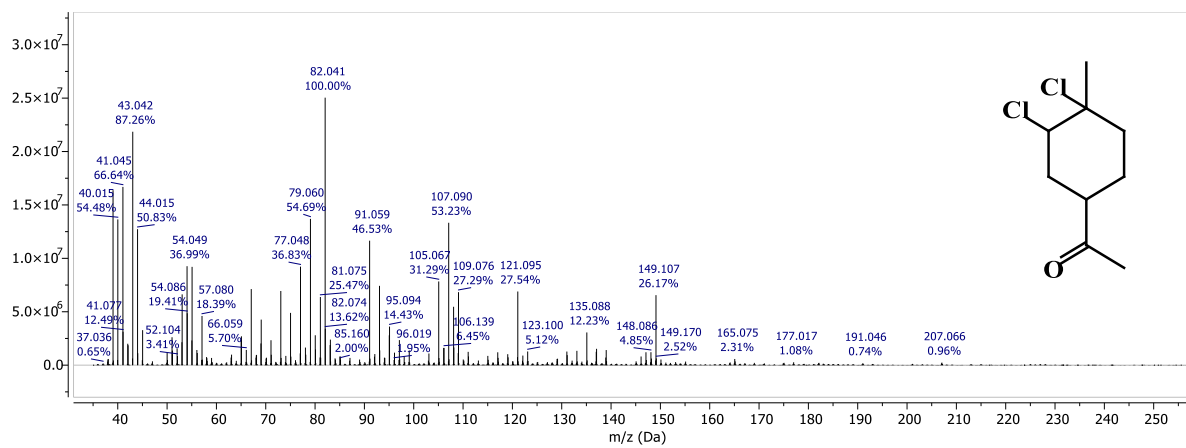

Figure S63: MS spectrum of the limona ketone dichloride **u**.

- Limona ketone epoxide **y**

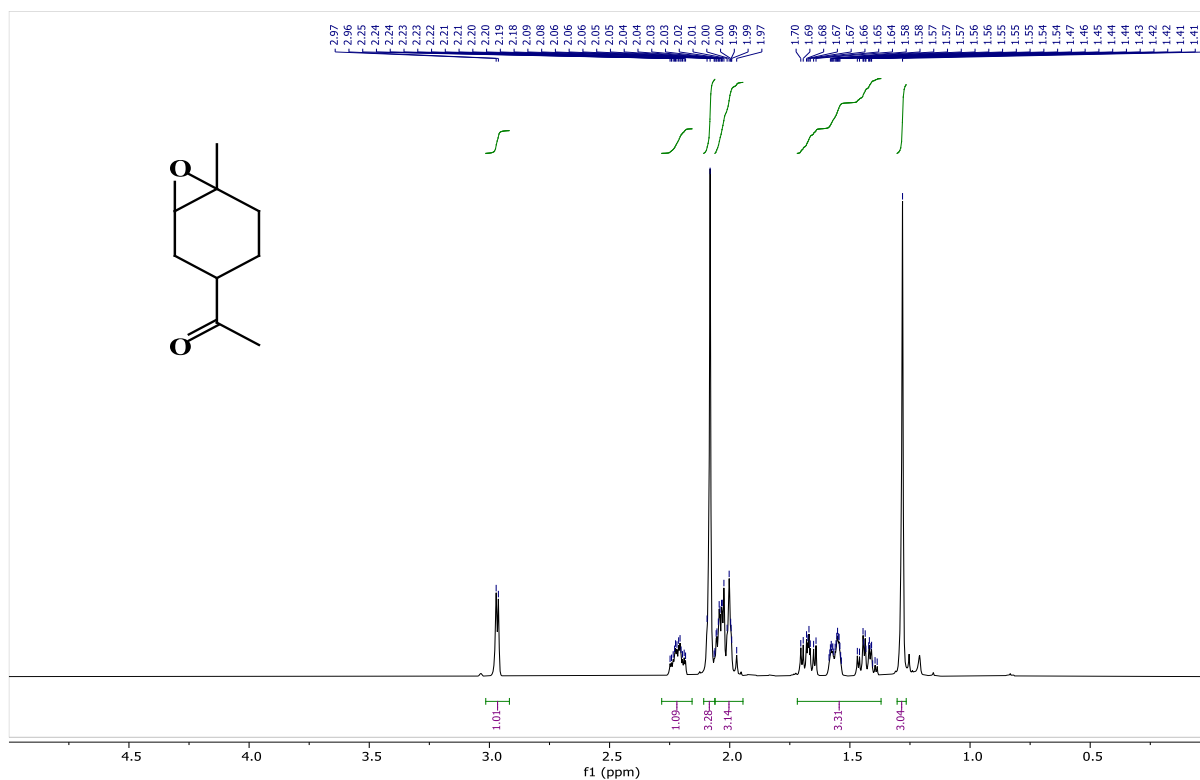

Figure S64:  $^1\text{H}$  NMR spectrum of the limona ketone epoxide **y**.

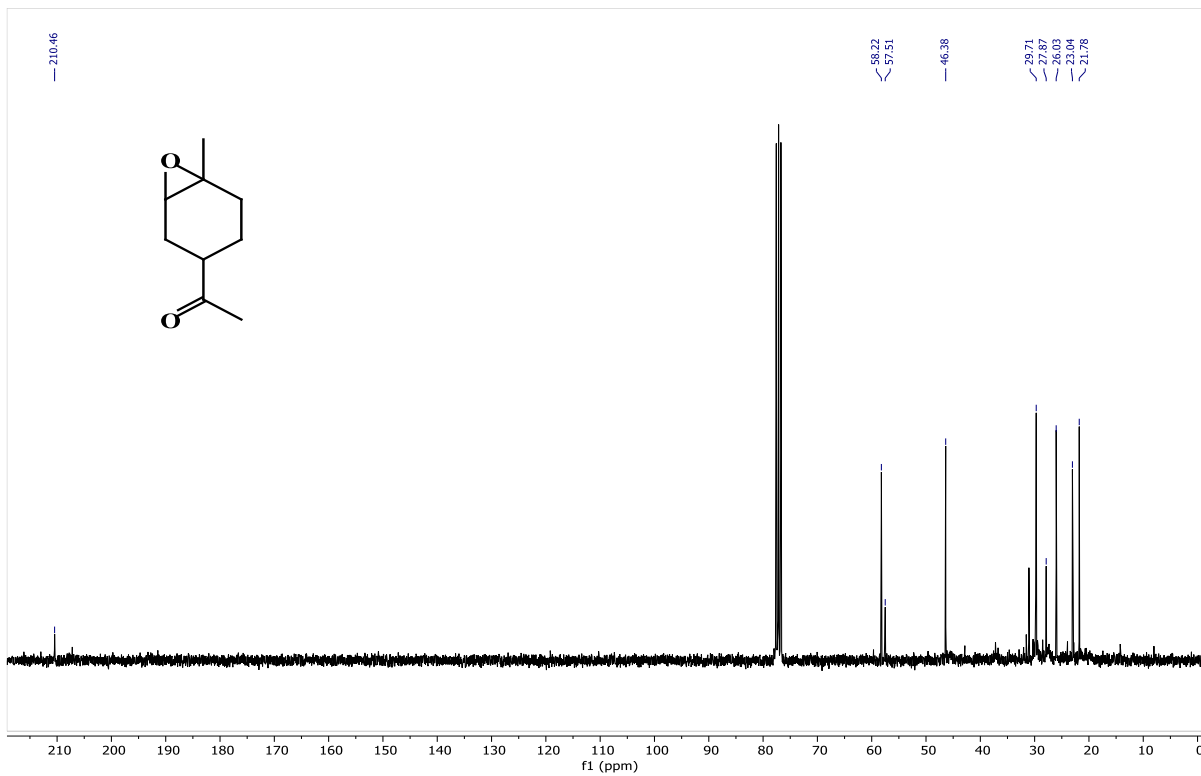

Figure S65:  $^{13}\text{C}$  spectrum of the limona ketone epoxide v.

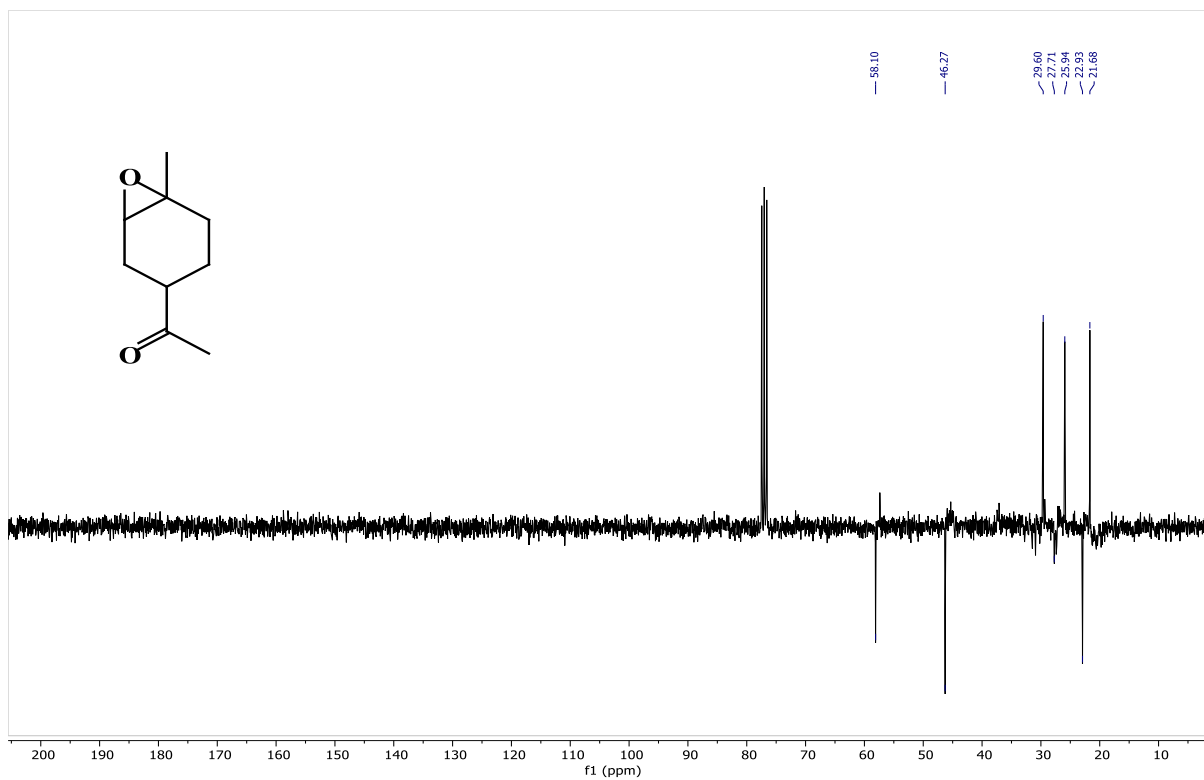

Figure S66: APT spectrum of the limona ketone epoxide v.

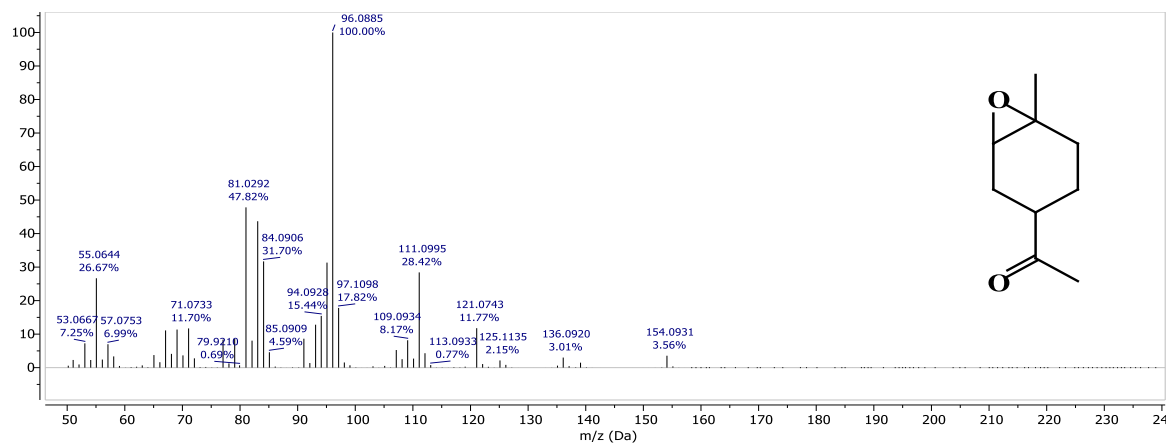

**Figure S67:** MS spectrum of the limona ketone dichloride **y**.
